# Supplementary material for: Monitoring of Non-β-Lactam Antibiotic Resistance-Associated Genes in ESBL Producing Enterobacterales Isolates
Source: PubMed Central journal article supplement (PMC7764327; doi:10.3390/antibiotics9120884), 2020-12-09
Supplement: antibiotics-09-00884-s001.pdf [file antibiotics-09-00884-s001.pdf]

## Supplementary Materials

# Monitoring of Non- $\beta$ -Lactam Antibiotic Resistance-Associated Genes in ESBL Producing *Enterobacterales* Isolates

Pottathil Shinu <sup>1,\*</sup>, Rajesh Bareja <sup>2</sup>, Anroop B. Nair <sup>3</sup>, Vashishth Mishra <sup>2</sup>, Snawar Hussain <sup>1</sup>, Katharigatta N. Venugopala <sup>3,4</sup>, Nagaraja Sreeharsha <sup>3,5</sup>, Mahesh Attimarad <sup>3</sup> and Sahibzada Tasleem Rasool <sup>1</sup>

<sup>1</sup> Department of Biomedical Sciences, College of Clinical Pharmacy, King Faisal University, Al-Ahsa 31982, Saudi Arabia; shhussain@kfu.edu.sa (S.H.); srasool@kfu.edu.sa (S.T.R.)

<sup>2</sup> Department of Microbiology, Faculty of Medicine, Government Medical College and Hospital, Badaun 243601, India; rajeshbareja@gmail.com (R.B.); vashishtmmishra38@gmail.com (V.M.)

<sup>3</sup> Department of Pharmaceutical Sciences, College of Clinical Pharmacy, King Faisal University, Al-Ahsa 31982, Saudi Arabia; anair@kfu.edu.sa (A.B.N.); kvenugopala@kfu.edu.sa (K.N.V.); sharsha@kfu.edu.sa (N.S.); mattimarad@kfu.edu.sa (M.A.)

<sup>4</sup> Department of Biotechnology and Food Technology, Durban University of Technology, Durban 4001, South Africa

<sup>5</sup> Department of Pharmaceutics, Vidya Siri College of Pharmacy, Off Sarjapura Road, Bangaluru 560035, India

\* Correspondence: spottathail@kfu.edu.sa (P.S.); Tel.: +966-559-732794

**Table S1.** Antibiotic resistance pattern of *Enterobacterales* isolates tested.

| Organism (N=186)                   | AMP (N=73)<br>)<br>% | CFZ (N=186)<br>)<br>% | AMC (N=161)<br>)<br>% | CTX (N=86)<br>)<br>% | FE (N=186)<br>)<br>% | CAZ (N=186)<br>)<br>% | CR (N=186)<br>)<br>% | FOX (N=164)<br>)<br>% | CPD (N=180)<br>)<br>% | CXM (N=186)<br>)<br>% | ZOX (N=186)<br>)<br>% | IPM (N=86)<br>)<br>% | MEM (N=86)<br>)<br>% | ATM (N=186)<br>)<br>% | GEN (N=186)<br>)<br>% | TOT (N=186)<br>)<br>% | AMK (N=186)<br>)<br>% | K (N=186)<br>)<br>% | CIP (N=186)<br>)<br>% | LVX (N=186)<br>)<br>% | NAL (N=186)<br>)<br>% | GAT (N=186)<br>)<br>% | MXF (N=186)<br>)<br>% | TMPSX (N=186)<br>)<br>% |
|------------------------------------|----------------------|-----------------------|-----------------------|----------------------|----------------------|-----------------------|----------------------|-----------------------|-----------------------|-----------------------|-----------------------|----------------------|----------------------|-----------------------|-----------------------|-----------------------|-----------------------|---------------------|-----------------------|-----------------------|-----------------------|-----------------------|-----------------------|-------------------------|
| <i>Escherichia coli</i> (N=58)     | 55(75.34)            | 49(26.34)             | 38(23.6)              | 48(31.17)            | 46(24.73)            | 52(27.96)             | 50(26.88)            | 41(25)                | 52(28.89)             | 50(26.88)             | 47(25.26)             | 22(11.83)            | 27(14.52)            | 54(9.03)              | 40(21.5)              | 45(24.19)             | 32(17.2)              | 40(21.5)            | 46(24.73)             | 40(21.5)              | 46(24.73)             | 47(33.57)             | 42(22.58)             | 56(30.1)                |
| <i>Klebsiella pneumonia</i> (N=74) | -                    | 69(37.01)             | 64(83.1)              | 63(33.87)            | 41(20.4)             | 66(35.48)             | 71(43.29)            | 64(39.02)             | 66(36.67)             | 69(37.09)             | 67(36)                | 30(13)               | 32(17.2)             | 68(36.56)             | 46(24.73)             | 50(26.88)             | 39(20.96)             | 36(19.35)           | 65(34.94)             | 56(30.1)              | 64(34.4)              | 62(33.33)             | 59(31.72)             | 67(36.02)               |

|                                    |           |           |            |           |            |            |            |            |            |            |          |           |           |            |            |            |           |            |            |            |            |            |            |            |
|------------------------------------|-----------|-----------|------------|-----------|------------|------------|------------|------------|------------|------------|----------|-----------|-----------|------------|------------|------------|-----------|------------|------------|------------|------------|------------|------------|------------|
| <i>Proteus mirabilis</i> (N=15)    | 15(20.55) | 15(8.06)  | 12(7.45)   | 9(0.87)   | 10(5.38)   | 13(6.99)   | 8(4.3)     | 11(6.7)    | 7(3.89)    | 9(4.84)    | 10(5.38) | 12(6.45)  | 11(5.91)  | 12(6.45)   | 7(3.76)    | 5(2.68)    | 3(1.61)   | 8(4.3)     | 8(4.3)     | 11(5.91)   | 11(5.91)   | 12(6.45)   | 12(6.45)   |            |
| <i>Citrobacter freundii</i> (N=13) | -         | 12(6.45)  | -          | 13(6.98)  | 11(5.91)   | 13(6.98)   | -          | 10(5.56)   | 11(5.91)   | 10(5.37)   | 7(3.76)  | 7(3.76)   | 10(5.38)  | 5(2.68)    | 7(3.76)    | 3(1.61)    | 6(3.2)    | 8(4.3)     | 7(3.76)    | 5(2.68)    | 6(3.22)    | 7(3.76)    | 11(5.91)   |            |
| <i>Klebsiella oxytoca</i> (N=11)   | -         | 10(5.38)  | 8(4.9)     | 8(4.3)    | 9(4.84)    | 11(5.91)   | 11(5.91)   | 7(4.27)    | 11(6.11)   | 10(5.37)   | 8(4.3)   | 6(3.23)   | 6(3.22)   | 11(5.91)   | 4(2.15)    | 6(3.22)    | 5(2.69)   | 6(3.2)     | 6(3.22)    | 8(4.3)     | 8(4.3)     | 7(3.76)    | 7(3.76)    | 9(4.83)    |
| <i>Enterobacter cloacae</i> (N=9)  | -         | 9(4.84)   | -          | 9(4.84)   | 5(2.69)    | 9(4.83)    | 7(3.76)    | -          | 9(5)       | 7(3.76)    | 9(4.84)  | 3(1.61)   | 3(1.61)   | 9(4.84)    | 8(4.3)     | 7(3.76)    | 6(3.23)   | 9(4.84)    | 4(2.15)    | 4(2.15)    | 4(2.15)    | 3(1.61)    | 3(1.61)    | 9(4.83)    |
| <i>Proteus vulgaris</i> (N=3)      | -         | 3(1.62)   | 2(1.24)    | 2(1.07)   | 1(0.53)    | 2(1.07)    | 2(1.07)    | 2(1.22)    | -          | 2(1.07)    | 2(1.07)  | -         | 1(0.54)   | 2(1.07)    | 1(0.53)    | 2(1.07)    | -         | 1(0.53)    | 1(0.53)    | 2(1.07)    | 3(1.61)    | 1(0.53)    | 1(0.53)    | 2(1.07)    |
| <i>Morganella morganii</i> (N=3)   | -         | 3(1.62)   | -          | 2(1.07)   | 1(0.53)    | 3(1.61)    | 2(1.07)    | 1(0.6)     | -          | 2(1.07)    | 2(1.07)  | -         | -         | 1(0.54)    | 2(1.07)    | 2(1.07)    | 2(1.07)   | 2(1.07)    | 2(0.01)    | 2(1.07)    | 2(1.07)    | 2(1.07)    | 2(1.07)    | 3(1.61)    |
| Total                              | 70(95.89) | 170(91.4) | 124(77.01) | 154(82.8) | 124(66.67) | 167(89.78) | 164(88.17) | 126(76.83) | 155(86.11) | 160(86.02) | 15(83.3) | 80(43.01) | 87(46.77) | 167(89.78) | 113(60.75) | 124(66.67) | 90(48.39) | 108(58.06) | 140(75.27) | 130(69.89) | 143(76.88) | 145(75.27) | 133(71.51) | 169(90.86) |

AMP- Ampicillin, CFZ- cefazolin, AMC- Amoxicillin- clavulanic acid, CTX –Cefotaxime, FEP- Cefepime, CAZ- Ceftazidime, CRO- Ceftriaxone, FOX- Cefoxitin, CPD- Cefpodoxime, CXM –Cefuroxime, ZOZ- Ceftazidime, IPM- Imipenem, MEM- Meropenem, ATM- Aztreonam, GEN- Gentamicin, TOB- Tobramycin, AMK- Amikacin, K- Kanamycin, CIP- Ciprofloxacin, LVX- Levofloxacin, NAL- Nalidixic acid, GAT- Gatifloxacin, MXF- Moxifloxacin, TMP-SXT- Trimethoprim-sulfamethoxazole

**Table S2.** Distribution of *Enterobacteriales* isolates in various specimens studied.

| Sr. No. | Year of isolation | Key for Isolates | Ward/Unit/Department | specimen              |
|---------|-------------------|------------------|----------------------|-----------------------|
| 1       | 2018              | EC1              | Orthopaedic          | Wound                 |
| 2       | 2018              | EC2              | Surgery              | Wound                 |
| 3       | 2018              | EC3              | ENT                  | Wound                 |
| 4       | 2018              | EC4              | Orthopaedic          | Wound                 |
| 5       | 2018              | EC5              | Orthopaedic          | Wound                 |
| 6       | 2018              | EC6              | Paediatric           | Pus                   |
| 7       | 2018              | EC7              | RICU                 | pus                   |
| 8       | 2018              | EC8              | Surgery              | Wound                 |
| 9       | 2018              | EC9              | ENT                  | Wound                 |
| 10      | 2018              | EC10             | PICU                 | Central line          |
| 11      | 2018              | EC11             | Surgery              | Ascitic fluid         |
| 12      | 2018              | EC12             | Burn ICU             | Wound                 |
| 13      | 2018              | EC13             | Orthopaedic          | surgical drain        |
| 14      | 2018              | EC14             | Orthopaedic          | Wound                 |
| 15      | 2018              | EC15             | Orthopaedic          | Wound                 |
| 16      | 2018              | EC16             | Paediatrics          | Wound                 |
| 17      | 2018              | EC17             | Emergency            | Wound                 |
| 18      | 2018              | EC18             | Orthopaedic          | Pus                   |
| 19      | 2018              | EC19             | Surgery              | Wound                 |
| 20      | 2018              | EC20             | PICU                 | Wound                 |
| 21      | 2018              | EC21             | Burn ICU             | Wound                 |
| 22      | 2018              | EC22             | Orthopaedic          | Wound                 |
| 23      | 2019              | EC23             | Orthopaedic          | Wound                 |
| 24      | 2019              | EC24             | Surgery              | Blood                 |
| 25      | 2019              | EC25             | orthopaedic          | Blood                 |
| 26      | 2019              | EC26             | Orthopaedic          | Blood                 |
| 27      | 2019              | EC27             | Surgery              | Blood                 |
| 28      | 2019              | EC28             | Paediatric           | Blood                 |
| 29      | 2019              | EC29             | Orthopaedic          | Blood                 |
| 30      | 2019              | EC30             | Surgery              | Peritoneal fluid      |
| 31      | 2019              | EC31             | Emergency            | Blood                 |
| 32      | 2019              | EC32             | Surgery              | Blood                 |
| 33      | 2019              | EC33             | Orthopaedic          | Blood                 |
| 34      | 2019              | EC34             | Orthopaedic          | Blood                 |
| 35      | 2019              | EC35             | Paediatrics          | Blood                 |
| 36      | 2019              | EC36             | Surgery              | Blood                 |
| 37      | 2019              | EC37             | Orthopaedic          | Nasal Swab            |
| 38      | 2019              | EC38             | Burn ICU             | Sputum                |
| 39      | 2019              | EC39             | Chest and TB         | Endotracheal aspirate |
| 40      | 2019              | EC40             | ENT                  | Nasal Swab            |
| 41      | 2019              | EC41             | Chest and TB         | Sputum                |
| 42      | 2019              | EC42             | Burn ICU             | Endotracheal aspirate |
| 43      | 2019              | EC43             | Chest and TB         | Sputum                |
| 44      | 2019              | EC44             | Chest and TB         | Sputum                |

|    |      |       |                  |                       |
|----|------|-------|------------------|-----------------------|
| 45 | 2019 | EC45  | General Medicine | Endotracheal aspirate |
| 46 | 2019 | EC46  | Chest and TB     | Sputum                |
| 47 | 2019 | EC47  | Chest and TB     | Sputum                |
| 48 | 2019 | EC48  | orthopaedic      | Sputum                |
| 49 | 2019 | EC49  | Burn ICU         | Endotracheal aspirate |
| 50 | 2019 | EC50  | Chest and TB     | Sputum                |
| 51 | 2019 | EC51  | Chest and TB     | Sputum                |
| 52 | 2019 | EC52  | paediatric       | Endotracheal aspirate |
| 53 | 2019 | EC53  | Chest and TB     | Sputum                |
| 54 | 2019 | EC54  | Emergency        | Endotracheal aspirate |
| 55 | 2019 | EC55  | ENT              | Sputum                |
| 56 | 2019 | EC56  | Surgery          | Endotracheal aspirate |
| 57 | 2019 | EC57  | Chest and TB     | Sputum                |
| 58 | 2019 | EC58  | orthopaedics     | Endotracheal aspirate |
| 59 | 2018 | KLP1  | Burn ICU         | Wound                 |
| 60 | 2018 | KLP2  | Emergency        | Wound                 |
| 61 | 2018 | KLP3  | Surgery          | Wound                 |
| 62 | 2018 | KLP4  | orthopaedics     | Pus                   |
| 63 | 2018 | KLP5  | Burn ICU         | Wound                 |
| 64 | 2018 | KLP6  | Burn ICU         | Wound                 |
| 65 | 2018 | KLP7  | orthopaedics     | Wound                 |
| 66 | 2018 | KLP8  | Burn ICU         | Wound                 |
| 67 | 2018 | KLP9  | Surgery          | Wound                 |
| 68 | 2018 | KLP10 | Surgery          | Wound                 |
| 69 | 2018 | KLP11 | General Medicine | Wound                 |
| 70 | 2018 | KLP12 | Burn ICU         | Wound                 |
| 71 | 2018 | KLP13 | Orthopaedic      | Pus                   |
| 72 | 2018 | KLP14 | Surgery          | Wound                 |
| 73 | 2018 | KLP15 | Emergency        | Wound                 |
| 74 | 2018 | KLP16 | Orthopaedic      | Wound                 |
| 75 | 2018 | KLP17 | Surgery          | Wound                 |
| 76 | 2018 | KLP18 | ENT              | Wound                 |
| 77 | 2018 | KLP19 | Paediatric       | Wound                 |
| 78 | 2018 | KLP20 | Orthopaedic      | surgical drainage     |
| 79 | 2018 | KLP21 | Burn ICU         | Wound                 |
| 80 | 2018 | KLP22 | Emergency        | Wound                 |
| 81 | 2018 | KLP23 | orthopaedic      | Wound                 |
| 82 | 2018 | KLP24 | PICU             | Pus                   |
| 83 | 2018 | KLP25 | Surgery          | Pus                   |
| 84 | 2018 | KLP26 | Burn ICU         | Wound                 |
| 85 | 2018 | KLP27 | ENT              | Wound                 |
| 86 | 2018 | KLP28 | Surgery          | Wound                 |
| 87 | 2018 | KLP29 | Emergency        | Blood                 |
| 88 | 2018 | KLP30 | Surgery          | Blood                 |
| 89 | 2018 | KLP31 | Surgery          | Blood                 |
| 90 | 2018 | KLP32 | orthopaedics     | Blood                 |

|     |      |       |                  |                       |
|-----|------|-------|------------------|-----------------------|
| 91  | 2018 | KLP33 | paediatrics      | Blood                 |
| 92  | 2018 | KLP34 | Orthopaedic      | Blood                 |
| 93  | 2018 | KLP35 | Burn ICU         | Blood                 |
| 94  | 2018 | KLP36 | NICU             | CSF                   |
| 95  | 2018 | KLP37 | orthopaedic      | Blood                 |
| 96  | 2018 | KLP38 | Burn ICU         | Blood                 |
| 97  | 2018 | KLP39 | Emergency        | Blood                 |
| 98  | 2018 | KLP40 | orthopaedic      | Blood                 |
| 99  | 2018 | KLP41 | PICU             | Blood                 |
| 100 | 2018 | KLP42 | Surgery          | Blood                 |
| 101 | 2018 | KLP43 | NICU             | CSF                   |
| 102 | 2018 | KLP44 | ENT              | Nasal Swab            |
| 103 | 2018 | KLP45 | orthopaedics     | Sputum                |
| 104 | 2018 | KLP46 | ENT              | Endotracheal aspirate |
| 105 | 2018 | KLP47 | Chest and TB     | Sputum                |
| 106 | 2019 | KLP48 | Chest and TB     | Sputum                |
| 107 | 2019 | KLP49 | paediatrics      | Endotracheal aspirate |
| 108 | 2019 | KLP50 | Chest and TB     | Endotracheal aspirate |
| 109 | 2019 | KLP51 | Chest and TB     | Sputum                |
| 110 | 2019 | KLP52 | Chest and TB     | Sputum                |
| 111 | 2019 | KLP53 | ENT              | Nasal Swab            |
| 112 | 2019 | KLP54 | Chest and TB     | Sputum                |
| 113 | 2019 | KLP55 | Chest and TB     | Endotracheal aspirate |
| 114 | 2019 | KLP56 | Chest and TB     | Sputum                |
| 115 | 2019 | KLP57 | Emergency        | Sputum                |
| 116 | 2019 | KLP58 | Chest and TB     | Endotracheal aspirate |
| 117 | 2019 | KLP59 | Chest and TB     | Sputum                |
| 118 | 2019 | KLP60 | Chest and TB     | Sputum                |
| 119 | 2019 | KLP61 | paediatrics      | Sputum                |
| 120 | 2019 | KLP62 | Chest and TB     | Endotracheal aspirate |
| 121 | 2019 | KLP63 | General Medicine | Sputum                |
| 122 | 2019 | KLP64 | Chest and TB     | Endotracheal aspirate |
| 123 | 2019 | KLP65 | Chest and TB     | Sputum                |
| 124 | 2019 | KLP66 | Emergency        | Sputum                |
| 125 | 2019 | KLP67 | Chest and TB     | Sputum                |
| 126 | 2019 | KLP68 | Emergency        | Sputum                |
| 127 | 2019 | KLP69 | Chest and TB     | Sputum                |
| 128 | 2019 | KLP70 | paediatrics      | Sputum                |
| 129 | 2019 | KLP71 | ENT              | Endotracheal aspirate |
| 130 | 2019 | KLP72 | paediatrics      | Sputum                |
| 131 | 2019 | KLP73 | Chest and TB     | Endotracheal aspirate |
| 132 | 2019 | KLP74 | Chest and TB     | Sputum                |
| 133 | 2018 | PLM1  | ENT              | Wound                 |
| 134 | 2018 | PLM2  | paediatrics      | Wound                 |
| 135 | 2018 | PLM3  | Emergency        | Wound                 |
| 136 | 2018 | PLM4  | ENT              | Wound                 |

|     |      |       |                    |                        |
|-----|------|-------|--------------------|------------------------|
| 137 | 2018 | PLM5  | Surgery            | Urinary catheter       |
| 138 | 2018 | PLM6  | Emergency          | Wound                  |
| 139 | 2019 | PLM7  | ENT                | Wound                  |
| 140 | 2019 | PLM8  | orthopaedics       | Wound                  |
| 141 | 2019 | PLM9  | ENT                | Wound                  |
| 142 | 2019 | PLM10 | Surgery            | Wound                  |
| 143 | 2019 | PLM11 | ENT                | Wound                  |
| 144 | 2019 | PLM12 | paediatrics        | Ascitic fluid          |
| 145 | 2019 | PLM13 | orthopaedics       | Wound                  |
| 146 | 2019 | PLM14 | Emergency          | Wound                  |
| 147 | 2019 | PLM15 | Surgery            | Wound                  |
| 148 | 2018 | CRF1  | Burn ICU           | Wound                  |
| 149 | 2018 | CRF2  | orthopaedics       | surgical drainage      |
| 150 | 2018 | CRF3  | Burn ICU           | Wound                  |
| 151 | 2018 | CRF4  | Emergency          | Wound                  |
| 152 | 2018 | CRF5  | Surgery            | Wound                  |
| 153 | 2018 | CRF6  | General Medicine   | Wound                  |
| 154 | 2019 | CRF7  | Burn ICU           | Wound                  |
| 155 | 2019 | CRF8  | Burn ICU           | Wound                  |
| 156 | 2019 | CRF9  | orthopaedics       | Wound                  |
| 157 | 2019 | CRF10 | Chest and TB       | Endo tracheal aspirate |
| 158 | 2019 | CRF11 | Burn ICU           | Blood                  |
| 159 | 2019 | CRF12 | orthopaedics       | Blood                  |
| 160 | 2019 | CRF13 | Surgery            | Blood                  |
| 161 | 2018 | KLO1  | ENT                | Nasal Swab             |
| 162 | 2018 | KLO2  | paediatrics        | Wound                  |
| 163 | 2018 | KLO3  | Burn ICU           | Wound                  |
| 164 | 2018 | KLO4  | Burn ICU           | Wound                  |
| 165 | 2018 | KLO5  | orthopaedics       | Wound                  |
| 166 | 2018 | KLO6  | orthopaedics       | surgical drainage      |
| 167 | 2019 | KLO7  | paediatrics        | Wound                  |
| 168 | 2019 | KLO8  | ENT                | Wound                  |
| 169 | 2019 | KLO9  | General Medicine   | Wound                  |
| 170 | 2019 | KLO10 | paediatrics        | Sputum                 |
| 171 | 2019 | KLO11 | Chest and TB       | Endotracheal aspirate  |
| 172 | 2018 | ERC1  | Emergency          | Wound                  |
| 173 | 2018 | ERC2  | ENT                | Wound                  |
| 174 | 2018 | ERC3  | Surgery            | Wound                  |
| 175 | 2018 | ERC4  | Emergency          | Wound                  |
| 176 | 2019 | ERC5  | orthopaedics       | Wound                  |
| 177 | 2019 | ERC6  | PICU               | Pus                    |
| 178 | 2019 | ERC7  | Surgery            | Wound                  |
| 179 | 2019 | ERC8  | Burn ICU           | Wound                  |
| 180 | 2019 | ERC9  | Chest and TB       | Sputum                 |
| 181 | 2018 | PSV1  | PICU               | Pus                    |
| 182 | 2018 | PSV2  | Emergency Medicine | Wound                  |

|     |      |      |              |        |
|-----|------|------|--------------|--------|
| 183 | 2019 | PSV3 | orthopaedics | Wound  |
| 184 | 2019 | MAM1 | Burn ICU     | Wound  |
| 185 | 2019 | MAM2 | Emergency    | Wound  |
| 186 | 2019 | MAM3 | Chest and TB | Sputum |

EC- *Escherichia coli*, KLP- *Klebsiella pneumonia*, PLM- *Proteus mirabilis*, CRF- *Citrobacter freundii*, KLO - *Klebsiella oxytoca*, ERC – *Enterobacter cloacae*, PSV- *Proteus vulgaris*, MAM- *Morganella morganii*

**Table S3.** Distribution of plasmid mediated quinolone resistance (PMQR) genes in extended spectrum beta-lactamase producing *Enterobacteriales* isolates.

| Isolate Key | Year of isolation | Cephalosporin susceptibility |     |     |     |     | Fluoroquinolone susceptibility |     |     |     |     | ESBL encoding genes |      |     |     |     | PMQR encoding genes |      |      |      |      |                |      |      |      |
|-------------|-------------------|------------------------------|-----|-----|-----|-----|--------------------------------|-----|-----|-----|-----|---------------------|------|-----|-----|-----|---------------------|------|------|------|------|----------------|------|------|------|
|             |                   | CTX                          | CAZ | CRO | CPD | ATM | CIP                            | LVX | NAL | GAT | MXF | TEM                 | CTXM | SHV | PER | VEB | qnrA                | qnrB | qnrC | qnrD | qnrS | aac (6')-lb-cr | oqxA | oqxB | qepA |
| EC12        | 2018              | R                            | R   | R   | R   | R   | R                              | R   | R   | R   | R   | +                   | +    | +   | +   | -   | -                   | -    | -    | +    | -    | +              | -    | -    | -    |
| EC13        | 2018              | R                            | R   | R   | R   | R   | R                              | R   | R   | R   | R   | +                   | +    | +   | +   | -   | -                   | -    | -    | +    | -    | +              | -    | -    | -    |
| EC11        | 2018              | R                            | R   | R   | R   | R   | R                              | R   | R   | R   | R   | +                   | +    | +   | -   | -   | -                   | -    | +    | +    | +    | -              | -    | -    |      |
| EC6         | 2018              | R                            | R   | R   | R   | R   | R                              | R   | R   | R   | R   | +                   | +    | -   | +   | -   | -                   | -    | -    | +    | +    | -              | -    | -    |      |
| EC7         | 2018              | R                            | R   | R   | R   | R   | R                              | R   | R   | R   | R   | +                   | +    | -   | +   | -   | -                   | -    | -    | +    | +    | -              | -    | -    |      |
| EC4         | 2018              | R                            | R   | R   | R   | R   | R                              | R   | R   | R   | R   | +                   | +    | -   | -   | +   | -                   | -    | -    | +    | +    | -              | -    | -    |      |
| EC14        | 2018              | R                            | R   | R   | R   | R   | R                              | R   | R   | R   | R   | +                   | +    | +   | -   | -   | -                   | -    | +    | -    | +    | -              | -    | -    |      |
| EC21        | 2018              | R                            | R   | R   | R   | R   | R                              | R   | R   | R   | R   | +                   | +    | +   | +   | -   | -                   | -    | -    | -    | +    | -              | -    | -    |      |
| EC22        | 2018              | R                            | R   | R   | R   | R   | R                              | R   | R   | R   | R   | +                   | +    | +   | +   | -   | -                   | -    | -    | -    | +    | -              | -    | -    |      |
| EC23        | 2019              | R                            | R   | R   | R   | R   | R                              | R   | R   | R   | R   | +                   | +    | +   | +   | -   | -                   | -    | -    | -    | +    | -              | -    | -    |      |
| EC33        | 2019              | R                            | R   | R   | R   | R   | R                              | R   | R   | R   | R   | +                   | +    | +   | -   | -   | -                   | +    | -    | -    | -    | -              | +    | +    | +    |
| EC41        | 2019              | R                            | R   | R   | R   | R   | R                              | ND  | R   | R   | R   | +                   | +    | +   | -   | -   | -                   | -    | -    | -    | -    | -              | -    | +    | -    |
| EC42        | 2019              | R                            | R   | R   | R   | R   | R                              | ND  | R   | R   | R   | +                   | +    | +   | -   | -   | -                   | -    | -    | -    | -    | -              | -    | +    | -    |
| EC43        | 2019              | R                            | R   | R   | R   | R   | R                              | ND  | R   | R   | ND  | +                   | +    | +   | -   | -   | -                   | -    | -    | -    | -    | -              | -    | +    | -    |
| EC44        | 2019              | R                            | R   | R   | R   | R   | R                              | ND  | R   | R   | ND  | +                   | +    | +   | -   | -   | -                   | -    | -    | -    | -    | -              | -    | +    | -    |
| EC20        | 2018              | R                            | R   | R   | R   | R   | R                              | R   | R   | R   | R   | +                   | +    | +   | -   | -   | -                   | -    | -    | -    | +    | -              | -    | -    |      |
| EC8         | 2018              | R                            | R   | R   | R   | R   | R                              | R   | R   | R   | R   | +                   | +    | -   | -   | -   | -                   | -    | -    | +    | +    | -              | -    | -    |      |
| EC9         | 2018              | R                            | R   | R   | R   | R   | R                              | R   | R   | R   | R   | +                   | +    | -   | -   | -   | -                   | -    | -    | +    | +    | -              | -    | -    |      |
| EC10        | 2018              | R                            | R   | R   | R   | R   | R                              | R   | R   | R   | R   | +                   | +    | -   | -   | -   | -                   | -    | -    | +    | +    | -              | -    | -    |      |
| EC3         | 2018              | R                            | R   | R   | R   | R   | R                              | R   | R   | R   | R   | +                   | +    | -   | -   | -   | +                   | -    | -    | -    | +    | +              | -    | -    | -    |
| EC5         | 2018              | R                            | R   | R   | R   | R   | R                              | R   | R   | R   | R   | +                   | +    | -   | -   | -   | -                   | -    | -    | +    | +    | -              | -    | -    |      |
| EC15        | 2018              | R                            | R   | R   | R   | R   | R                              | R   | R   | R   | R   | +                   | +    | -   | -   | -   | -                   | -    | +    | -    | +    | -              | -    | -    |      |
| EC16        | 2018              | R                            | R   | R   | R   | R   | R                              | R   | R   | R   | R   | +                   | +    | -   | -   | -   | -                   | -    | +    | -    | +    | -              | -    | -    |      |
| EC17        | 2018              | R                            | R   | R   | R   | R   | R                              | R   | R   | R   | R   | +                   | +    | -   | -   | -   | -                   | -    | +    | -    | +    | -              | -    | -    |      |
| EC18        | 2018              | R                            | R   | R   | R   | R   | R                              | R   | R   | R   | R   | +                   | +    | -   | -   | -   | -                   | -    | -    | -    | +    | -              | -    | -    |      |



|       |      |   |   |   |   |   |   |   |   |   |   |   |   |   |   |   |   |   |   |   |   |   |   |   |   |   |
|-------|------|---|---|---|---|---|---|---|---|---|---|---|---|---|---|---|---|---|---|---|---|---|---|---|---|---|
| EC19  | 2018 | R | R | R | R | R | R | R | R | R | R | R | + | + | - | - | - | - | - | - | - | - | + | - | - | - |
| EC24  | 2019 | R | R | R | R | R | R | R | R | R | R | R | + | + | - | - | - | - | - | - | - | - | + | + | + | - |
| EC25  | 2019 | R | R | R | R | R | R | R | R | R | R | R | + | + | - | - | - | - | - | - | - | - | + | + | + | - |
| EC26  | 2019 | R | R | R | R | R | R | R | R | R | R | R | + | + | - | - | - | - | - | - | - | - | + | + | + | - |
| EC27  | 2019 | R | R | R | R | R | R | R | R | R | R | R | + | + | - | - | - | - | - | - | - | - | + | + | + | - |
| EC28  | 2019 | R | R | R | R | R | R | R | R | R | R | R | + | + | - | - | - | - | + | + | - | - | + | + | + | - |
| EC29  | 2019 | R | R | R | R | R | R | R | R | R | R | R | + | + | - | - | - | - | + | + | - | - | + | + | + | - |
| EC36  | 2019 | R | R | R | R | R | R | R | R | R | R | R | - | + | + | - | - | - | + | - | - | - | - | + | + | - |
| EC37  | 2019 | R | R | R | R | R | R | R | R | R | R | R | - | + | + | - | - | - | + | - | - | - | - | + | + | - |
| EC39  | 2019 | R | R | R | R | R | R | R | R | R | R | R | + | - | + | - | - | - | + | - | - | - | - | - | + | - |
| EC40  | 2019 | R | R | R | R | R | R | R | R | R | R | R | + | - | + | - | - | - | - | - | - | - | - | - | + | - |
| EC1   | 2018 | R | R | R | R | R | R | R | R | R | R | R | - | + | - | + | - | + | - | - | - | + | + | - | - | - |
| EC32  | 2019 | R | R | R | R | R | R | R | R | R | R | R | + | - | + | - | - | + | + | - | - | - | + | + | + | + |
| EC30  | 2019 | R | R | R | R | R | R | R | R | R | R | R | + | - | - | - | - | + | + | + | - | - | + | + | + | - |
| EC31  | 2019 | R | R | R | R | R | R | R | R | R | R | R | + | - | - | - | - | + | + | + | - | - | + | + | + | + |
| EC34  | 2019 | R | R | R | R | R | R | R | R | R | R | R | - | - | + | - | - | + | + | - | - | - | - | + | + | + |
| EC35  | 2019 | R | R | R | R | R | R | R | R | R | R | R | - | - | + | - | - | + | + | - | - | - | - | + | + | + |
| EC38  | 2019 | R | R | R | R | R | R | R | R | R | R | R | - | - | + | - | - | + | + | - | - | - | - | - | + | - |
| EC2   | 2018 | R | R | R | R | R | R | R | R | R | R | R | - | + | - | - | - | + | - | - | - | + | + | - | - | - |
| KLP1  | 2018 | R | R | R | R | R | R | R | R | R | R | R | + | - | + | + | + | - | - | - | + | + | + | + | + | - |
| KLP8  | 2018 | R | R | R | R | R | R | R | R | R | R | R | + | + | + | + | - | - | - | - | + | - | + | + | + | - |
| KLP12 | 2018 | R | R | R | R | R | R | R | R | R | R | R | + | + | + | + | - | - | - | - | + | - | + | + | + | - |
| KLP16 | 2018 | R | R | R | R | R | R | R | R | R | R | R | + | + | + | + | - | - | - | - | + | - | + | + | + | - |
| KLP17 | 2018 | R | R | R | R | R | R | R | R | R | R | R | + | + | + | + | - | - | - | - | + | - | + | + | + | - |
| KLP4  | 2018 | R | R | R | R | R | R | R | R | R | R | R | + | + | - | + | - | - | - | - | + | - | + | + | + | - |
| KLP6  | 2018 | R | R | R | R | R | R | R | R | R | R | R | + | + | - | - | + | - | - | - | + | - | + | + | + | - |
| KLP7  | 2018 | R | R | R | R | R | R | R | R | R | R | R | + | + | + | - | - | - | - | - | + | - | + | + | + | - |
| KLP9  | 2018 | R | R | R | R | R | R | R | R | R | R | R | + | + | + | - | - | - | - | - | + | - | + | + | + | - |
| KLP11 | 2018 | R | R | R | R | R | R | R | R | R | R | R | + | - | + | + | - | - | - | - | + | - | + | + | + | - |

|       |      |   |   |   |   |   |   |   |   |   |   |   |   |   |   |   |   |   |   |   |   |   |   |   |   |   |
|-------|------|---|---|---|---|---|---|---|---|---|---|---|---|---|---|---|---|---|---|---|---|---|---|---|---|---|
| KLP15 | 2018 | R | R | R | R | R | R | R | R | R | R | R | + | + | + | - | - | - | - | - | + | - | + | + | + | - |
| KLP18 | 2018 | R | R | R | R | R | R | R | R | R | R | R | + | + | + | - | - | - | - | - | - | - | + | + | + | - |
| KLP19 | 2018 | R | R | R | R | R | R | R | R | R | R | R | + | + | + | - | - | - | - | - | - | - | + | + | + | - |
| KLP20 | 2018 | R | R | R | R | R | R | R | R | R | R | R | + | + | + | - | - | - | - | - | - | - | + | + | + | - |
| KLP26 | 2018 | R | R | R | R | R | R | R | R | R | R | R | + | + | + | - | - | - | + | - | - | - | + | + | + | - |
| KLP27 | 2018 | R | R | R | R | R | R | R | R | R | R | R | + | + | + | - | - | - | + | - | - | - | + | + | + | - |
| KLP28 | 2018 | R | R | R | R | R | R | R | R | R | R | R | + | + | + | - | - | - | + | - | - | - | + | + | + | - |
| KLP29 | 2018 | R | R | R | R | R | R | R | R | R | R | R | + | + | + | - | - | - | + | - | - | - | + | + | + | - |
| KLP30 | 2018 | R | R | R | R | R | R | R | R | R | R | R | + | + | + | - | - | - | + | - | - | - | + | + | + | - |
| KLP41 | 2018 | R | R | R | R | R | R | R | R | R | R | R | + | + | + | - | - | - | + | - | - | - | + | + | + | - |
| KLP43 | 2018 | R | R | R | R | R | R | R | R | R | R | R | + | + | + | - | - | - | + | - | - | - | + | + | + | - |
| KLP44 | 2018 | R | R | R | R | R | R | R | R | R | R | R | + | + | + | - | - | - | + | - | - | - | + | + | + | - |
| KLP45 | 2018 | R | R | R | R | R | R | R | R | R | R | R | + | + | + | - | - | - | + | - | - | - | + | + | + | - |
| KLP36 | 2018 | R | R | R | R | R | R | R | R | R | R | R | + | + | + | - | - | - | + | - | - | - | + | + | + | - |
| KLP32 | 2018 | R | R | R | R | R | R | R | R | R | R | R | + | - | + | + | - | - | + | - | - | - | + | + | + | - |
| KLP33 | 2018 | R | R | R | R | R | R | R | R | R | R | R | + | - | + | + | - | - | + | - | - | - | + | + | + | - |
| KLP34 | 2018 | R | R | R | R | R | R | R | R | R | R | R | + | - | + | + | - | - | + | - | - | - | + | + | + | - |
| KLP22 | 2018 | R | R | R | R | R | R | R | R | R | R | R | + | + | - | + | - | - | + | - | - | - | + | + | + | - |
| KLP23 | 2018 | R | R | R | R | R | R | R | R | R | R | R | + | + | - | + | - | - | + | - | - | - | + | + | + | - |
| KLP21 | 2018 | R | R | R | R | R | R | R | R | R | R | R | + | - | - | + | - | - | - | - | - | - | + | + | + | - |
| KLP42 | 2018 | R | R | R | R | R | R | R | R | R | R | R | - | + | + | - | + | - | + | - | - | - | + | + | + | - |
| KLP37 | 2018 | R | R | R | R | R | R | R | R | R | R | R | + | + | - | - | + | - | + | - | - | - | + | + | + | - |
| KLP5  | 2018 | R | R | R | R | R | R | R | R | R | R | R | + | + | - | - | - | - | - | - | + | - | + | + | + | - |
| KLP10 | 2018 | R | R | R | R | R | R | R | R | R | R | R | + | + | - | - | - | - | - | - | + | - | + | + | + | - |
| KLP24 | 2018 | R | R | R | R | R | R | R | R | R | R | R | + | + | - | - | - | - | + | - | - | - | + | + | + | - |
| KLP25 | 2018 | R | R | R | R | R | R | R | R | R | R | R | + | + | - | - | - | - | + | - | - | - | + | + | + | - |
| KLP31 | 2018 | R | R | R | R | R | R | R | R | R | R | R | + | + | - | - | - | - | + | - | - | - | + | + | + | - |
| KLP38 | 2018 | R | R | R | R | R | R | R | R | R | R | R | + | + | - | - | - | - | + | - | - | - | + | + | + | - |
| KLP39 | 2018 | R | R | R | R | R | R | R | R | R | R | R | + | + | - | - | - | - | + | - | - | - | + | + | + | - |

|       |      |   |   |   |   |   |   |    |    |   |    |   |   |   |   |   |   |   |   |   |   |   |   |   |   |
|-------|------|---|---|---|---|---|---|----|----|---|----|---|---|---|---|---|---|---|---|---|---|---|---|---|---|
| KLP40 | 2018 | R | R | R | R | R | R | R  | R  | R | R  | + | + | - | - | - | - | + | - | - | - | + | + | + | - |
| KLP47 | 2018 | R | R | R | R | R | R | R  | R  | R | R  | + | + | - | - | - | - | + | - | - | - | + | + | + | - |
| KLP48 | 2019 | R | R | R | R | R | R | R  | R  | R | R  | + | + | - | - | - | - | + | - | - | - | + | + | + | - |
| KLP49 | 2019 | R | R | R | R | R | R | R  | R  | R | R  | + | + | - | - | - | - | + | - | - | - | + | + | + | - |
| KLP50 | 2019 | R | R | R | R | R | R | R  | R  | R | R  | + | + | - | - | - | - | + | - | - | - | + | + | + | - |
| KLP51 | 2019 | R | R | R | R | R | R | R  | R  | R | R  | + | + | - | - | - | - | + | - | - | - | + | + | + | - |
| KLP55 | 2019 | R | R | R | R | R | R | R  | R  | R | R  | + | + | - | - | - | - | + | - | - | - | - | + | + | - |
| KLP56 | 2019 | R | R | R | R | R | R | R  | R  | R | R  | + | + | - | - | - | - | + | - | - | - | - | + | + | - |
| KLP57 | 2019 | R | R | R | R | R | R | ND | R  | R | R  | + | + | - | - | - | - | + | - | - | - | - | + | + | - |
| KLP59 | 2019 | R | R | R | R | R | R | ND | R  | R | R  | + | + | - | - | - | - | - | - | - | - | - | - | + | - |
| KLP60 | 2019 | R | R | R | R | R | R | ND | R  | R | ND | + | + | - | - | - | - | - | - | - | - | - | - | + | - |
| KLP61 | 2019 | R | R | R | R | R | R | ND | R  | R | ND | + | + | - | - | - | - | - | - | - | - | - | - | + | - |
| KLP62 | 2019 | R | R | R | R | R | R | ND | R  | R | ND | + | + | - | - | - | - | - | - | - | - | - | - | + | - |
| KLP13 | 2018 | R | R | R | R | R | R | R  | R  | R | R  | - | + | + | - | - | - | - | - | + | - | + | + | + | - |
| KLP14 | 2018 | R | R | R | R | R | R | R  | R  | R | R  | - | + | + | - | - | - | - | - | + | - | + | + | + | - |
| KLP35 | 2018 | R | R | R | R | R | R | R  | R  | R | R  | - | + | + | - | - | - | + | - | - | - | + | + | + | - |
| KLP2  | 2018 | R | R | R | R | R | R | R  | R  | R | R  | + |   | + | - | - | - | - | - | + | + | + | + | + | - |
| KLP52 | 2019 | R | R | R | R | R | R | R  | R  | R | R  | - | + | - | - | - | - | + | - | - | - | - | + | + | - |
| KLP53 | 2019 | R | R | R | R | R | R | R  | R  | R | R  | - | + | - | - | - | - | + | - | - | - | - | + | + | - |
| KLP54 | 2019 | R | R | R | R | R | R | R  | R  | R | R  | - | + | - | - | - | - | + | - | - | - | - | + | + | - |
| KLP3  | 2018 | R | R | R | R | R | R | R  | R  | R | R  | + |   | - | - | - | - | - | - | + | + | + | + | + | - |
| KLP58 | 2019 | R | R | R | R | R | R | ND | R  | R | R  | - | + | - | - | - | - | - | - | - | - | - | + | + | - |
| KLP46 | 2018 | R | R | R | R | R | R | R  | R  | R | R  | - | + | - | - | + | - | + | - | - | - | + | + | + | - |
| PLM2  | 2018 | R | R | R | R | R | R | R  | R  | R | R  | + | + | + | - | + | - | - | - | - | + | + | - | + | - |
| PLM6  | 2018 | R | R | R | R | R | R | R  | R  | R | R  | + |   | - | + | + | + | - | - | - | + | + | + | + | - |
| PLM8  | 2019 | R | R | R | S | R | R | R  | R  | R | R  | + | + | + | - | - | + | - | - | - | + | - | + | + | - |
| PLM10 | 2019 | R | R | S | S | R | I | R  | R  | R | R  | + | + | - | + | - | + | - | - | - | - | - | + | - | - |
| PLM11 | 2019 | R | R | S | S | R | I | R  | R  | R | R  | + | + | - | - | - | + | - | - | - | - | - | + | - | - |
| PLM12 | 2019 | R | R | S | S | R | I | ND | ND | R | R  | - | + | - | - | + | + | - | - | - | - | - | + | - | - |

|      |      |   |   |   |   |   |   |    |    |    |    |   |   |   |   |   |   |   |   |   |   |   |   |   |   |
|------|------|---|---|---|---|---|---|----|----|----|----|---|---|---|---|---|---|---|---|---|---|---|---|---|---|
| PLM1 | 2018 | R | R | R | R | R | R | R  | R  | R  | R  | + | - | - | + | + | - | - | - | - | + | + | - | + | - |
| PLM4 | 2018 | R | R | R | R | R | R | R  | R  | R  | R  | + | + | - | - | + | - | - | - | - | + | + | + | + | - |
| PLM3 | 2018 | R | R | R | R | R | R | R  | R  | R  | R  | + | + | - | - | - | - | - | - | - | + | + | - | + | - |
| PLM5 | 2018 | R | R | R | R | R | R | R  | R  | R  | R  | + | - | - | - | - | + | - | - | - | + | + | + | + | - |
| PLM7 | 2019 | R | R | R | R | R | R | R  | R  | R  | R  | + | - | - | - | + | + | - | - | - | + | + | + | + | - |
| PLM9 | 2019 | R | R | S | S | R | S | R  | R  | R  | R  | + | - | - | - | + | + | - | - | - | + | - | + | - | - |
| CRF3 | 2018 | R | R | R | R | R | R | R  | R  | R  | R  | + | + | - | - | - | - | + | - | - | - | + | - | - | - |
| CRF6 | 2018 | R | R | R | R | R | R | R  | ND | R  | R  | + | + | - | - | - | - | + | - | - | - | + | - | - | - |
| CRF1 | 2018 | R | R | R | R | R | R | R  | R  | R  | R  | - | + | + | - | - | - | - | - | - | - | + | - | - | - |
| CRF2 | 2018 | R | R | R | R | R | R | R  | R  | R  | R  | - | + | + | - | - | - | + | - | - | - | + | - | - | - |
| CRF4 | 2018 | R | R | R | R | R | R | R  | R  | R  | R  | + | - | - | - | - | - | + | - | - | - | + | - | - | - |
| CRF5 | 2018 | R | R | R | R | R | R | R  | R  | R  | R  | + | - | - | + | - | - | + | - | - | - | + | - | - | - |
| CRF7 | 2019 | R | R | R | R | R | R | R  | ND |    | R  | + | - | - | - | - | - | + | - | - | - | + | - | - | - |
| KLO6 | 2018 | R | R | R | R | R | R | R  | R  | R  | R  | + | + | + | + | - | - | - | - | - | - | + | - | - | - |
| KLO7 | 2019 | R | R | R | R | R | S | R  | R  | R  | R  | + | + | + | - | - | - | - | - | - | - | + | - | - | - |
| KLO5 | 2018 | R | R | R | R | R | R | R  | R  | R  | R  | + | + | + | - | - | - | + | - | - | - | + | - | - | - |
| KLO4 | 2018 | R | R | R | R | R | R | R  | R  | R  | R  | - | + | + | + | - | - | + | - | - | - | + | + | - | - |
| KLO3 | 2018 | R | R | R | R | R | R | R  | R  | R  | R  | + | - | + | - | - | - | + | - | + | - | + | + | + | - |
| KLO2 | 2018 | R | R | R | R | R | R | R  | R  | R  | R  | + | - | - | - | + | - | + | - | + | - | + | + | + | - |
| KLO1 | 2018 | R | R | R | R | R | R | R  | R  | R  | R  | + | - | - | - | - | - | + | - | + | - | - | + | + | - |
| ERC1 | 2018 | R | R | R | R | R | R | R  | R  | R  | R  | + | + | - | - | + | - | - | - | - | + | + | + | - | - |
| ERC2 | 2018 | R | R | R | R | R | R | R  | R  | R  | R  | + | - | - | + | - | - | - | - | - | + | + | + | - | - |
| ERC3 | 2018 | R | R | R | R | R | R | R  | R  | R  | R  | + | - | - | - | - | - | - | - | - | + | - | - | - | - |
| PSV1 | 2018 | R | R | S | - | R | R | R  | ND | R  | R  | + | - | - | + | - | + | - | - | - | - | + | - | - | - |
| PSV2 | 2018 | R | R | I | - | R | S | R  | R  | ND | ND | + | - | - | - | - | + | - | - | - | - | + | - | - | - |
| PSV3 | 2019 | S | S | R | - | S | S | ND | R  | ND | ND | + | - | - | - | - | - | - | - | - | - | + | - | - | - |
| MAM1 | 2019 | R | R | R | - | R | R | R  | R  | R  | R  | + | - | - | - | - | - | + | - | - | - | - | - | - | - |

**Abbreviations used in Tables;** EC- *Escherichia coli*, KLP- *Klebsiella pneumonia*, PLM- *Proteus mirabilis*, CRF- *Citrobacter freundii*, KLO - *Klebsiella oxytoca*, ERC – *Enterobacter cloacae*, PSV- *Proteus vulgaris*, MAM- *Morganella morganii*, R- Resistance, S- Susceptible, I –Intermediate Resistance, ND- Not done

**Table S4.** Distribution of aminoglycoside modifying enzyme (AME) genes in extended spectrum beta-lactamase producing *Enterobacteriales*.

| Key  | Year | B-lactam susceptibility |     |      |      |      | Aminoglycoside susceptibility |       |       |   |                           | ESBL                        |                           |                           |                           |                   | AME               |                    |                    |                     |                     |                      |                    |                     |             |  |
|------|------|-------------------------|-----|------|------|------|-------------------------------|-------|-------|---|---------------------------|-----------------------------|---------------------------|---------------------------|---------------------------|-------------------|-------------------|--------------------|--------------------|---------------------|---------------------|----------------------|--------------------|---------------------|-------------|--|
|      |      | CTX                     | CAZ | CR O | CP D | AT M | GEN                           | T O B | A M K | K | <i>bla</i> <sub>TEM</sub> | <i>bla</i> <sub>CTX-M</sub> | <i>bla</i> <sub>SHV</sub> | <i>bla</i> <sub>PER</sub> | <i>bla</i> <sub>VEB</sub> | <i>aac</i> (3)-Ib | <i>aac</i> (3)-Ia | <i>aac</i> (3)-IIa | <i>aac</i> (6')-Ib | <i>ant</i> (2'')-Ia | <i>ant</i> (3'')-Ia | <i>ant</i> (4'')-IIa | <i>aph</i> (3')-Ia | <i>aph</i> (3'')-Ib | <i>armA</i> |  |
| EC12 | 2018 | R                       | R   | R    | R    | R    | R                             | R     | R     | R | +                         | +                           | +                         | +                         | -                         | -                 | -                 | +                  | +                  | -                   | -                   | -                    | +                  | -                   | -           |  |
| EC13 | 2018 | R                       | R   | R    | R    | R    | R                             | R     | R     | R | +                         | +                           | +                         | +                         | -                         | -                 | -                 | +                  | +                  | -                   | -                   | +                    | +                  | -                   | -           |  |
| EC21 | 2018 | R                       | R   | R    | R    | R    | R                             | R     | R     | R | +                         | +                           | +                         | +                         | -                         | -                 | +                 | -                  | +                  | -                   | +                   | -                    | +                  | +                   | -           |  |
| EC22 | 2018 | R                       | R   | R    | R    | R    | R                             | R     | R     | R | +                         | +                           | +                         | +                         | -                         | -                 | +                 | -                  | +                  | -                   | +                   | -                    | +                  | +                   | -           |  |
| EC23 | 2019 | R                       | R   | R    | R    | R    | R                             | R     | R     | R | +                         | +                           | +                         | +                         | -                         | -                 | +                 | -                  | +                  | -                   | +                   | -                    | +                  | +                   | -           |  |
| EC20 | 2018 | R                       | R   | R    | R    | R    | R                             | R     | R     | R | +                         | +                           | +                         | -                         | -                         | -                 | +                 | -                  | +                  | -                   | +                   | +                    | +                  | +                   | -           |  |
| EC14 | 2018 | R                       | R   | R    | R    | R    | R                             | R     | R     | R | +                         | +                           | +                         | -                         | -                         | -                 | -                 | +                  | +                  | -                   | -                   | +                    | +                  | -                   | -           |  |
| EC11 | 2018 | R                       | R   | R    | R    | R    | R                             | R     | R     | R | +                         | +                           | +                         | -                         | -                         | -                 | -                 | +                  | +                  | -                   | -                   | -                    | +                  | -                   | -           |  |
| EC6  | 2018 | R                       | R   | R    | R    | R    | R                             | R     | R     | R | +                         | +                           | -                         | +                         | -                         | -                 | -                 | +                  | +                  | -                   | -                   | -                    | -                  | -                   | -           |  |
| EC7  | 2018 | R                       | R   | R    | R    | R    | R                             | R     | R     | R | +                         | +                           | -                         | +                         | -                         | -                 | -                 | +                  | +                  | -                   | -                   | -                    | -                  | -                   | -           |  |
| EC4  | 2018 | R                       | R   | R    | R    | R    | R                             | R     | R     | R | +                         | +                           | -                         | -                         | +                         | -                 | -                 | +                  | +                  | -                   | -                   | -                    | -                  | -                   | -           |  |
| EC33 | 2019 | R                       | R   | R    | R    | R    | R                             | R     | S     | R | +                         | +                           | +                         | -                         | -                         | -                 | -                 | -                  | -                  | -                   | +                   | -                    | -                  | +                   | -           |  |
| EC3  | 2018 | R                       | R   | R    | R    | R    | R                             | R     | R     | R | +                         | +                           | -                         | -                         | -                         | -                 | -                 | +                  | +                  | -                   | -                   | -                    | -                  | -                   | -           |  |
| EC5  | 2018 | R                       | R   | R    | R    | R    | R                             | R     | R     | R | +                         | +                           | -                         | -                         | -                         | -                 | -                 | +                  | +                  | -                   | -                   | -                    | -                  | -                   | -           |  |
| EC8  | 2018 | R                       | R   | R    | R    | R    | R                             | R     | R     | R | +                         | +                           | -                         | -                         | -                         | -                 | -                 | +                  | +                  | -                   | -                   | -                    | -                  | -                   | -           |  |
| EC9  | 2018 | R                       | R   | R    | R    | R    | R                             | R     | R     | R | +                         | +                           | -                         | -                         | -                         | -                 | -                 | +                  | +                  | -                   | -                   | -                    | -                  | -                   | -           |  |
| EC10 | 2018 | R                       | R   | R    | R    | R    | R                             | R     | R     | R | +                         | +                           | -                         | -                         | -                         | -                 | -                 | +                  | +                  | -                   | -                   | -                    | +                  | -                   | -           |  |
| EC15 | 2018 | R                       | R   | R    | R    | R    | R                             | R     | R     | R | +                         | +                           | -                         | -                         | -                         | -                 | -                 | +                  | +                  | -                   | +                   | +                    | +                  | -                   | -           |  |
| EC16 | 2018 | R                       | R   | R    | R    | R    | R                             | R     | R     | R | +                         | +                           | -                         | -                         | -                         | -                 | -                 | +                  | +                  | -                   | +                   | +                    | +                  | -                   | -           |  |
| EC17 | 2018 | R                       | R   | R    | R    | R    | R                             | R     | R     | R | +                         | +                           | -                         | -                         | -                         | -                 | -                 | +                  | +                  | -                   | +                   | +                    | +                  | +                   | -           |  |

|     |    |   |   |   |   |   |   |   |   |   |   |   |   |   |   |   |   |   |   |   |   |   |   |   |   |
|-----|----|---|---|---|---|---|---|---|---|---|---|---|---|---|---|---|---|---|---|---|---|---|---|---|---|
| EC1 | 20 | R | R | R | R | R | R | R | R | R | + | + | - | - | - | + | - | + | + | - | + | + | + | + | - |
| EC1 | 20 | R | R | R | R | R | R | R | R | R | + | + | - | - | - | + | + | - | + | - | + | + | + | + | - |
| EC2 | 20 | R | R | R | R | R | R | R | R | R | + | + | - | - | - | - | + | - | + | - | + | - | + | + | - |
| EC2 | 20 | R | R | R | R | R | R | R | R | R | + | + | - | - | - | - | - | - | + | - | + | - | + | + | - |
| EC2 | 20 | R | R | R | R | R | R | R | R | R | + | + | - | - | - | - | - | - | + | - | + | - | - | + | - |
| EC2 | 20 | R | R | R | R | R | R | R | R | R | + | + | - | - | - | - | - | - | + | - | + | - | - | + | - |
| EC2 | 20 | R | R | R | R | R | R | R | R | R | + | + | - | - | - | - | - | - | + | - | + | - | - | + | - |
| EC2 | 20 | R | R | R | R | R | R | R | R | R | + | + | - | - | - | - | - | - | + | - | + | - | - | + | - |
| EC2 | 20 | R | R | R | R | R | R | R | R | R | + | + | - | - | - | - | - | - | - | + | - | - | - | + | - |
| EC2 | 20 | R | R | R | R | R | R | R | R | R | + | + | - | - | - | - | - | - | - | + | - | - | - | + | - |
| EC2 | 20 | R | R | R | R | R | R | R | R | R | + | + | - | - | - | - | - | - | - | + | - | - | - | + | - |
| EC2 | 20 | R | R | R | R | R | R | R | R | R | + | + | - | - | - | - | - | - | - | + | - | - | - | + | - |
| EC3 | 20 | R | R | R | R | R | R | R | R | R | + | - | + | - | - | - | - | - | - | - | + | - | - | + | - |
| EC3 | 20 | R | R | R | R | R | R | R | S | R | + | - | + | - | - | - | - | - | - | - | - | - | - | - | + |
| EC4 | 20 | R | R | R | R | R | R | R | S | R | + | - | + | - | - | - | - | - | - | - | - | - | - | - | + |
| EC3 | 20 | R | R | R | R | R | R | R | S | R | - | + | + | - | - | - | - | - | - | - | + | - | - | + | + |
| EC3 | 20 | R | R | R | R | R | R | R | S | R | - | + | + | - | - | - | - | - | - | - | - | - | - | - | + |
| EC1 | 20 | R | R | R | R | R | R | R | R | R | - | + | - | + | - | - | - | - | + | + | - | - | - | - | - |
| EC2 | 20 | R | R | R | R | R | R | R | R | R | - | + | - | - | - | - | - | - | + | + | - | - | - | - | - |
| EC3 | 20 | R | R | R | R | R | R | R | R | R | + | - | - | - | - | - | - | - | - | - | + | - | - | + | - |
| EC3 | 20 | R | R | R | R | R | R | R | R | R | + | - | - | - | - | - | - | - | - | - | + | - | - | + | - |
| EC3 | 20 | R | R | R | R | R | R | R | S | R | - | - | + | - | - | - | - | - | - | - | + | - | - | + | - |
| EC3 | 20 | R | R | R | R | R | R | R | S | R | - | - | + | - | - | - | - | - | - | - | + | - | - | + | - |
| EC3 | 20 | R | R | R | R | R | R | R | S | R | - | - | + | - | - | - | - | - | - | - | - | - | - | - | + |
| KLP | 20 | R | R | R | R | R | R | R | R | R | + | - | + | + | + | + | - | - | + | + | - | - | - | - | - |
| KLP | 20 | R | R | R | R | R | R | R | R | R | + | + | + | + | - | - | - | + | + | + | + | - | + | + | - |
| KLP | 20 | R | R | R | R | R | R | R | R | R | + | + | + | + | - | - | - | + | + | + | + | - | + | + | - |
| KLP | 20 | R | R | R | R | R | R | R | R | R | + | + | + | + | - | - | - | - | + | - | + | - | + | - | - |

|        |      |   |   |   |   |   |   |   |   |   |   |   |   |   |   |   |   |   |   |   |   |   |   |   |   |
|--------|------|---|---|---|---|---|---|---|---|---|---|---|---|---|---|---|---|---|---|---|---|---|---|---|---|
| KLP 12 | 2018 | R | R | R | R | R | R | R | R | R | + | + | + | + | - | - | - | - | + | - | + | - | + | - | - |
| KLP 4  | 2018 | R | R | R | R | R | R | R | R | R | + | + | - | + | - | + | - | - | + | - | - | - | - | - | - |
| KLP 18 | 2018 | R | R | R | R | R | R | R | R | R | + | + | + | - | - | - | - | + | + | + | + | - | + | + | - |
| KLP 7  | 2018 | R | R | R | R | R | R | R | R | R | + | + | + | - | - | - | - | - | + | - | + | - | + | - | - |
| KLP 9  | 2018 | R | R | R | R | R | R | R | R | R | + | + | + | - | - | - | - | - | + | - | + | - | + | - | - |
| KLP 11 | 2018 | R | R | R | R | R | R | R | R | R | + | - | + | + | - | - | - | - | + | - | + | - | + | - | - |
| KLP 15 | 2018 | R | R | R | R | R | R | R | R | R | + | + | + | - | - | - | - | + | + | + | + | - | + | - | - |
| KLP 19 | 2018 | R | R | R | R | R | R | R | R | R | + | + | + | - | - | - | - | + | + | - | + | - | + | + | - |
| KLP 20 | 2018 | R | R | R | R | R | R | R | R | R | + | + | + | - | - | - | - | + | + | - | + | - | + | + | - |
| KLP 22 | 2018 | R | R | R | R | R | R | R | R | R | + | + | - | + | - | - | - | + | + | - | + | - | + | + | + |
| KLP 23 | 2018 | R | R | R | R | R | R | R | R | R | + | + | - | + | - | - | - | - | + | + | - | + | - | + | + |
| KLP 26 | 2018 | R | R | R | R | R | R | R | R | R | + | + | + | - | - | - | - | + | + | - | - | + | + | + | + |
| KLP 27 | 2018 | R | R | R | R | R | R | R | R | R | + | + | + | - | - | - | - | + | + | - | - | + | + | + | + |
| KLP 28 | 2018 | R | R | R | R | R | R | R | R | R | + | + | + | - | - | - | - | + | + | - | - | - | + | + | + |
| KLP 29 | 2018 | R | R | R | R | R | R | R | R | R | + | + | + | - | - | - | - | + | + | - | - | - | + | + | + |
| KLP 30 | 2018 | R | R | R | R | R | R | R | R | R | + | + | + | - | - | - | - | + | + | - | - | - | + | + | + |
| KLP 32 | 2018 | R | R | R | R | R | R | R | R | R | + | - | + | + | - | - | - | - | + | - | - | - | + | - | - |
| KLP 33 | 2018 | R | R | R | R | R | R | R | R | R | + | - | + | + | - | - | - | - | + | - | - | - | + | - | - |
| KLP 34 | 2018 | R | R | R | R | R | R | R | R | R | + | - | + | + | - | - | - | - | + | - | - | - | + | - | - |
| KLP 41 | 2018 | R | R | R | R | R | R | R | S | S | + | + | + | - | - | - | - | - | + | - | - | - | - | - | - |
| KLP 42 | 2018 | R | R | R | R | R | R | R | S | S | - | + | + | - | + | - | - | - | + | - | - | - | - | - | - |
| KLP 43 | 2018 | R | R | R | R | R | R | R | S | S | + | + | + | - | - | - | - | - | + | - | - | - | - | - | - |
| KLP 44 | 2018 | R | R | R | R | R | R | R | S | S | + | + | + | - | - | - | - | - | + | - | - | - | - | - | - |
| KLP 45 | 2018 | R | R | R | R | R | R | R | S | S | + | + | + | - | - | - | - | - | + | - | - | - | - | - | - |

|        |      |   |   |   |   |   |   |   |   |   |   |   |   |   |   |   |   |   |   |   |   |   |   |   |   |
|--------|------|---|---|---|---|---|---|---|---|---|---|---|---|---|---|---|---|---|---|---|---|---|---|---|---|
| KLP 36 | 2018 | R | R | R | R | R | R | R | R | R | + | + | + | - | - | - | - | - | + | - | - | - | - | - | - |
| KLP 6  | 2018 | R | R | R | R | R | R | R | R | R | + | + | - | - | + | - | - | - | + | - | - | - | + | - | - |
| KLP 37 | 2018 | R | R | R | R | R | R | R | R | S | + | + | - | - | + | - | - | - | + | - | - | - | - | - | - |
| KLP 2  | 2018 | R | R | R | R | R | R | R | R | R | + | - | + | - | - | + | - | - | + | - | - | - | - | - | - |
| KLP 5  | 2018 | R | R | R | R | R | R | R | R | R | + | + | - | - | - | - | - | - | + | - | - | - | - | - | - |
| KLP 24 | 2018 | R | R | R | R | R | R | R | R | R | + | + | - | - | - | - | - | + | + | - | - | + | + | + | + |
| KLP 25 | 2018 | R | R | R | R | R | R | R | R | R | + | + | - | - | - | - | - | + | + | - | - | + | + | + | + |
| KLP 10 | 2018 | R | R | R | R | R | R | R | R | R | + | + | - | - | - | - | - | - | + | - | + | - | + | - | - |
| KLP 13 | 2018 | R | R | R | R | R | R | R | R | R | - | + | + | - | - | - | - | + | + | + | + | - | + | - | - |
| KLP 14 | 2018 | R | R | R | R | R | R | R | R | R | - | + | + | - | - | - | - | + | + | + | + | - | + | - | - |
| KLP 3  | 2018 | R | R | R | R | R | R | R | R | R | + | - | - | - | - | + | - | - | + | - | - | - | - | - | - |
| KLP 21 | 2018 | R | R | R | R | R | R | R | R | R | + | - | - | + | - | - | - | + | + | - | + | - | + | + | + |
| KLP 31 | 2018 | R | R | R | R | R | R | R | R | R | + | + | - | - | - | - | - | + | + | - | - | - | + | - | - |
| KLP 35 | 2018 | R | R | R | R | R | R | R | R | R | - | + | + | - | - | - | - | - | + | - | - | - | + | - | - |
| KLP 38 | 2018 | R | R | R | R | R | R | R | R | S | + | + | - | - | - | - | - | - | + | - | - | - | - | - | - |
| KLP 39 | 2018 | R | R | R | R | R | R | R | R | S | + | + | - | - | - | - | - | - | + | - | - | - | - | - | - |
| KLP 40 | 2018 | R | R | R | R | R | R | R | S | S | + | + | - | - | - | - | - | - | + | - | - | - | - | - | - |
| KLP 46 | 2018 | R | R | R | R | R | R | R | S | S | - | + | - | - | + | - | - | - | + | - | - | - | - | - | - |
| PL M2  | 2018 | R | R | R | R | R | R | R | R | R | + | + | + | - | + | - | - | - | + | - | + | - | - | - | - |
| PL M1  | 2018 | R | R | R | R | R | R | R | R | R | + | - | - | + | + | - | - | + | + | - | + | + | + | + | - |
| PL M3  | 2018 | R | R | R | R | R | R | R | R | R | + | + | - | - | - | - | - | - | + | - | - | - | - | - | - |
| CRF 1  | 2018 | R | R | R | R | R | R | R | R | R | - | + | + | - | - | + | + | - | + | - | - | - | - | - | - |
| CRF 2  | 2018 | R | R | R | R | R | R | R | R | R | - | + | + | - | - | + | - | - | + | - | - | - | - | - | - |
| CRF 3  | 2018 | R | R | R | R | R | R | R | R | R | + | + | - | - | - | + | - | - | - | - | - | - | - | - | - |



|       |      |   |   |   |   |   |   |   |   |   |   |   |   |   |   |   |   |   |   |   |   |   |   |   |   |
|-------|------|---|---|---|---|---|---|---|---|---|---|---|---|---|---|---|---|---|---|---|---|---|---|---|---|
| CRF 4 | 2018 | R | R | R | R | R | R | R | S | R | + | - | - | - | - | - | - | + | - | - | + | - | - | - | - |
| CRF 5 | 2018 | R | R | R | R | R | R | R | S | R | + | - | - | + | - | - | - | + | - | - | + | - | - | - | - |
| CRF 6 | 2018 | R | R | R | R | R | S | R | S | R | + | + | - | - | - | - | - | + | - | - | + | - | - | - | - |
| KL O4 | 2018 | R | R | R | R | R | R | R | R | R | - | + | + | + | - | - | - | - | + | - | - | - | - | - | - |
| KL O2 | 2018 | R | R | R | R | R | R | R | R | R | + | - | - | - | + | - | - | + | + | - | - | - | - | - | + |
| KL O3 | 2018 | R | R | R | R | R | R | R | R | R | + | - | + | - | - | - | - | - | + | - | - | - | - | - | - |
| KL O1 | 2018 | R | R | R | R | R | R | R | R | R | + | - | - | - | - | + | - | + | + | + | - | - | - | + | + |
| ERC 1 | 2018 | R | R | R | R | R | R | R | R | R | + | + | - | - | + | + | - | + | + | + | + | - | - | + | - |
| ERC 2 | 2018 | R | R | R | R | R | R | R | R | R | + | - | - | + | - | - | - | + | - | + | - | - | - | + | - |
| ERC 3 | 2018 | R | R | R | R | R | R | R | R | R | + | - | - | - | - | - | - | + | - | - | - | - | - | - | - |
| PSV 1 | 2018 | R | R | S | R | R | R | S | S | R | + | - | - | + | - | - | - | - | - | - | + | - | - | - | - |
| MA M1 | 2019 | R | R | R | R | R | R | R | R | R | + | - | - | - | - | - | - | + | + | - | - | - | - | - | - |

**Abbreviations used in Tables ;** EC- *Escherichia coli*, KLP- *Klebsiella pneumonia*, PLM- *Proteus mirabilis* ,CRF- *Citrobacter freundii*, KLO - *Klebsiella oxytoca*, ERC – *Enterobacter cloacae*, PSV- *Proteus vulgaris*, MAM- *Morganella morganii*, R- Resistance, S- Susceptible, I –Intermediate Resistance, ND- Not done

**Table S5.** Distribution of TMP-SMX resistant genes in extended spectrum beta-lactamase producing *Enterobacterales*.

| Key  | Year | B-lactam susceptibility |     |     |     |     | TMP-SMX susceptibility | ESBL encoding genes detected |                            |                          |                          |                          | TMP-SMX      |              |              |
|------|------|-------------------------|-----|-----|-----|-----|------------------------|------------------------------|----------------------------|--------------------------|--------------------------|--------------------------|--------------|--------------|--------------|
|      |      | CTX                     | CAZ | CRO | CPD | ATM | TMP-SMX                | <i>bla<sub>TEM</sub></i>     | <i>bla<sub>CTX-M</sub></i> | <i>bla<sub>SHV</sub></i> | <i>bla<sub>PER</sub></i> | <i>bla<sub>VEB</sub></i> | <i>sul 1</i> | <i>sul 2</i> | <i>dfr A</i> |
| EC12 | 2018 | R                       | R   | R   | R   | R   | R                      | +                            | +                          | +                        | +                        | -                        | +            | -            | +            |
| EC13 | 2018 | R                       | R   | R   | R   | R   | R                      | +                            | +                          | +                        | +                        | -                        | +            | -            | +            |
| EC21 | 2018 | R                       | R   | R   | R   | R   | R                      | +                            | +                          | +                        | +                        | -                        | +            | -            | -            |
| EC22 | 2018 | R                       | R   | R   | R   | R   | R                      | +                            | +                          | +                        | +                        | -                        | +            | -            | -            |
| EC20 | 2018 | R                       | R   | R   | R   | R   | R                      | +                            | +                          | +                        | -                        | -                        | +            | -            | +            |
| EC14 | 2018 | R                       | R   | R   | R   | R   | R                      | +                            | +                          | +                        | -                        | -                        | +            | -            | +            |
| EC11 | 2018 | R                       | R   | R   | R   | R   | R                      | +                            | +                          | +                        | -                        | -                        | +            | -            | +            |
| EC6  | 2018 | R                       | R   | R   | R   | R   | R                      | +                            | +                          | -                        | +                        | -                        | +            | -            | +            |
| EC7  | 2018 | R                       | R   | R   | R   | R   | R                      | +                            | +                          | -                        | +                        | -                        | +            | -            | +            |
| EC4  | 2018 | R                       | R   | R   | R   | R   | R                      | +                            | +                          | -                        | -                        | +                        | +            | -            | +            |
| EC23 | 2019 | R                       | R   | R   | R   | R   | R                      | +                            | +                          | +                        | +                        | -                        | +            | -            | -            |
| EC33 | 2019 | R                       | R   | R   | R   | R   | R                      | +                            | +                          | +                        | -                        | -                        | +            | +            | -            |
| EC27 | 2019 | R                       | R   | R   | R   | R   | R                      | +                            | +                          | -                        | -                        | -                        | +            | +            | -            |
| EC28 | 2019 | R                       | R   | R   | R   | R   | R                      | +                            | +                          | -                        | -                        | -                        | +            | +            | -            |
| EC29 | 2019 | R                       | R   | R   | R   | R   | R                      | +                            | +                          | -                        | -                        | -                        | +            | +            | -            |
| EC15 | 2018 | R                       | R   | R   | R   | R   | R                      | +                            | +                          | -                        | -                        | -                        | +            | -            | +            |
| EC16 | 2018 | R                       | R   | R   | R   | R   | R                      | +                            | +                          | -                        | -                        | -                        | +            | -            | +            |
| EC17 | 2018 | R                       | R   | R   | R   | R   | R                      | +                            | +                          | -                        | -                        | -                        | +            | -            | +            |
| EC18 | 2018 | R                       | R   | R   | R   | R   | R                      | +                            | +                          | -                        | -                        | -                        | +            | -            | +            |
| EC19 | 2018 | R                       | R   | R   | R   | R   | R                      | +                            | +                          | -                        | -                        | -                        | +            | -            | +            |
| EC8  | 2018 | R                       | R   | R   | R   | R   | R                      | +                            | +                          | -                        | -                        | -                        | +            | -            | +            |
| EC9  | 2018 | R                       | R   | R   | R   | R   | R                      | +                            | +                          | -                        | -                        | -                        | +            | -            | +            |
| EC10 | 2018 | R                       | R   | R   | R   | R   | R                      | +                            | +                          | -                        | -                        | -                        | +            | -            | +            |
| EC5  | 2018 | R                       | R   | R   | R   | R   | R                      | +                            | +                          | -                        | -                        | -                        | +            | -            | +            |
| EC3  | 2018 | R                       | R   | R   | R   | R   | R                      | +                            | +                          | -                        | -                        | -                        | +            | -            | +            |
| EC24 | 2019 | R                       | R   | R   | R   | R   | R                      | +                            | +                          | -                        | -                        | -                        | +            | -            | -            |

|       |      |   |   |   |   |   |   |   |   |   |   |   |   |   |   |
|-------|------|---|---|---|---|---|---|---|---|---|---|---|---|---|---|
| EC25  | 2019 | R | R | R | R | R | R | + | + | - | - | - | + | - | - |
| EC26  | 2019 | R | R | R | R | R | R | + | + | - | - | - | + | - | - |
| EC30  | 2019 | R | R | R | R | R | R | + | - | - | - | - | + | + | - |
| EC31  | 2019 | R | R | R | R | R | R | + | - | - | - | - | + | + | - |
| EC32  | 2019 | R | R | R | R | R | R | + | - | + | - | - | + | + | - |
| EC34  | 2019 | R | R | R | R | R | R | - | - | + | - | - | + | + | - |
| EC35  | 2019 | R | R | R | R | R | R | - | - | + | - | - | + | + | - |
| EC1   | 2018 | R | R | R | R | R | R | - | + | - | + | - | + | - | + |
| EC2   | 2018 | R | R | R | R | R | R | - | + | - | - | - | + | - | + |
| KLP8  | 2018 | R | R | R | R | R | R | + | + | + | + | - | + | - | + |
| KLP12 | 2018 | R | R | R | R | R | R | + | + | + | + | - | + | - | + |
| KLP1  | 2018 | R | R | R | R | R | R | + | - | + | + | + | + | + | + |
| KLP16 | 2018 | R | R | R | R | R | R | + | + | + | + | - | + | - | + |
| KLP17 | 2018 | R | R | R | R | R | R | + | + | + | + | - | + | - | + |
| KLP7  | 2018 | R | R | R | R | R | R | + | + | + | - | - | + | - | + |
| KLP11 | 2018 | R | R | R | R | R | R | + | - | + | + | - | + | - | + |
| KLP15 | 2018 | R | R | R | R | R | R | + | + | + | - | - | + | - | + |
| KLP18 | 2018 | R | R | R | R | R | R | + | + | + | - | - | + | - | + |
| KLP19 | 2018 | R | R | R | R | R | R | + | + | + | - | - | + | - | + |
| KLP20 | 2018 | R | R | R | R | R | R | + | + | + | - | - | + | - | + |
| KLP22 | 2018 | R | R | R | R | R | R | + | + | - | + | - | + | - | + |
| KLP23 | 2018 | R | R | R | R | R | R | + | + | - | + | - | + | - | + |
| KLP26 | 2018 | R | R | R | R | R | R | + | + | + | - | - | + | - | + |
| KLP27 | 2018 | R | R | R | R | R | R | + | + | + | - | - | + | - | + |
| KLP28 | 2018 | R | R | R | R | R | R | + | + | + | - | - | + | - | + |
| KLP29 | 2018 | R | R | R | R | R | R | + | + | + | - | - | + | - | - |
| KLP30 | 2018 | R | R | R | R | R | R | + | + | + | - | - | + | - | - |
| KLP32 | 2018 | R | R | R | R | R | R | + | - | + | + | - | + | - | - |
| KLP33 | 2018 | R | R | R | R | R | R | + | - | + | + | - | + | - | - |
| KLP34 | 2018 | R | R | R | R | R | R | + | - | + | + | - | + | - | - |

|       |      |   |   |   |   |   |   |   |   |   |   |   |   |   |   |
|-------|------|---|---|---|---|---|---|---|---|---|---|---|---|---|---|
| KLP36 | 2018 | R | R | R | R | R | R | + | + | + | - | - | + | - | - |
| KLP43 | 2018 | R | R | R | R | R | R | + | + | + | - | - | + | - | - |
| KLP44 | 2018 | R | R | R | R | R | R | + | + | + | - | - | + | - | - |
| KLP45 | 2018 | R | R | R | R | R | R | + | + | + | - | - | + | - | - |
| KLP42 | 2018 | R | R | R | R | R | R | - | + | + | - | + | + | - | - |
| KLP41 | 2018 | R | R | R | R | R | R | + | + | + | - | - | + | - | - |
| KLP4  | 2018 | R | R | R | R | R | R | + | + | - | + | - | + | + | + |
| KLP9  | 2018 | R | R | R | R | R | R | + | + | + | - | - | + | - | + |
| KLP5  | 2018 | R | R | R | R | R | R | + | + | - | - | - | + | + | + |
| KLP6  | 2018 | R | R | R | R | R | R | + | + | - | - | + | + | + | + |
| KLP13 | 2018 | R | R | R | R | R | R | - | + | + | - | - | + | - | + |
| KLP14 | 2018 | R | R | R | R | R | R | - | + | + | - | - | + | - | + |
| KLP37 | 2018 | R | R | R | R | R | R | + | + | - | - | + | + | - | - |
| KLP38 | 2018 | R | R | R | R | R | R | + | + | - | - | - | + | - | - |
| KLP39 | 2018 | R | R | R | R | R | R | + | + | - | - | - | + | - | - |
| KLP40 | 2018 | R | R | R | R | R | R | + | + | - | - | - | + | - | - |
| KLP2  | 2018 | R | R | R | R | R | R | + | - | + | - | - | + | + | + |
| KLP10 | 2018 | R | R | R | R | R | R | + | + | - | - | - | + | - | + |
| KLP21 | 2018 | R | R | R | R | R | R | + | - | - | + | - | + | - | + |
| KLP24 | 2018 | R | R | R | R | R | R | + | + | - | - | - | + | - | + |
| KLP25 | 2018 | R | R | R | R | R | R | + | + | - | - | - | + | - | + |
| KLP31 | 2018 | R | R | R | R | R | R | + | + | - | - | - | + | - | - |
| KLP35 | 2018 | R | R | R | R | R | R | - | + | + | - | - | + | - | - |
| KLP3  | 2018 | R | R | R | R | R | R | + | - | - | - | - | + | + | + |
| KLP46 | 2018 | R | R | R | R | R | R | - | + | - | - | + | + | - | - |
| PLM2  | 2018 | R | R | R | R | R | R | + | + | + | - | + | + | - | + |
| PLM4  | 2018 | R | R | R | R | R | R | + | + | - | - | + | + | - | - |
| PLM6  | 2018 | R | R | R | R | R | R | + | - | - | + | + | + | - | - |
| PLM1  | 2018 | R | R | R | R | R | R | + | - | - | + | + | + | - | + |
| PLM3  | 2018 | R | R | R | R | R | R | + | + | - | - | - | + | - | - |

|      |      |   |   |   |   |   |   |   |   |   |   |   |   |   |   |
|------|------|---|---|---|---|---|---|---|---|---|---|---|---|---|---|
| PLM5 | 2018 | R | R | R | R | R | R | + | - | - | - | - | + | - | - |
| CRF1 | 2018 | R | R | R | R | R | R | - | + | + | - | - | + | - | + |
| CRF2 | 2018 | R | R | R | R | R | R | - | + | + | - | - | + | - | + |
| CRF3 | 2018 | R | R | R | R | R | R | + | + | - | - | - | + | - | + |
| CRF5 | 2018 | R | R | R | R | R | R | + | - | - | + | - | + | - | - |
| CRF6 | 2018 | R | R | R | R | R | R | + | + | - | - | - | + | - | - |
| CRF4 | 2018 | R | R | R | R | R | R | + | - | - | - | - | + | - | + |
| CRF7 | 2019 | R | R | R | R | R | R | + | - | - | - | - | + | - | - |
| KLO6 | 2018 | R | R | R | R | R | R | + | + | + | + | - | + | - | - |
| KLO4 | 2018 | R | R | R | R | R | R | - | + | + | + | - | + | - | - |
| KLO5 | 2018 | R | R | R | R | R | R | + | + | + | - | - | + | - | - |
| KLO3 | 2018 | R | R | R | R | R | R | + | - | + | - | - | + | - | - |
| KLO1 | 2018 | R | R | R | R | R | R | + | - | - | - | - | + | + | + |
| KLO2 | 2018 | R | R | R | R | R | R | + | - | - | - | + | + | - | - |
| ERC5 | 2019 | R | R | R | R | R | R | + | + | + | + | + | + | - | - |
| ERC1 | 2018 | R | R | R | R | R | R | + | + | - | - | + | + | + | + |
| ERC2 | 2018 | R | R | R | R | R | R | + | - | - | + | - | + | - | + |
| ERC3 | 2018 | R | R | R | R | R | R | + | - | - | - | - | + | - | - |
| ERC4 | 2018 | R | R | R | R | R | R | - | + | + | - | - | + | - | - |
| PSV1 | 2018 | R | R | S | - | R | R | + | - | - | + | - | + | - | + |
| PSV2 | 2018 | R | R | S | - | R | R | + | - | - | - | - | + | - | - |
| MAM1 | 2019 | R | R | R | - | R | R | + | - | - | - | - | + | - | - |

**Abbreviations used in Tables ;** EC- *Escherichia coli*, KLP- *Klebsiella pneumonia*, PLM- *Proteus mirabilis*, CRF- *Citrobacter freundii*, KLO - *Klebsiella oxytoca*, ERC – *Enterobacter cloacae*, PSV- *Proteus vulgaris*, MAM- *Morganella morganii* , R- Resistance , S- Susceptible ,I –Intermediate Resistance , ND- Not done

**Table S6.** Distribution plasmid mediated quinolone resistance genes in extended spectrum beta-lactamase producing *Enterobacteriales* isolates and its comparison with minimum inhibitory concentrations of fluoroquinolones tested.

| Key For Isolates tested | Year of isolation | MICs of Fluoroquinolones |      |     |      |      | PMQR encoding genes |             |             |             |             |                       |             |             |             |
|-------------------------|-------------------|--------------------------|------|-----|------|------|---------------------|-------------|-------------|-------------|-------------|-----------------------|-------------|-------------|-------------|
|                         |                   | CIP                      | LVX  | NAL | GAT  | MXF  | <i>qnrA</i>         | <i>qnrB</i> | <i>qnrC</i> | <i>qnrD</i> | <i>qnrS</i> | <i>aac (6')-lb-cr</i> | <i>oqxA</i> | <i>oqxB</i> | <i>qepA</i> |
| EC7                     | 2018              | 1024                     | 1024 | 64  | 512  | 256  | -                   | -           | -           | -           | +           | +                     | -           | -           | -           |
| EC22                    | 2018              | 1024                     | 1024 | 256 | 256  | 512  | -                   | -           | -           | -           | +           | +                     | -           | -           | -           |
| EC42                    | 2019              | 1024                     | 512  | 256 | 1024 | 512  | -                   | -           | -           | +           | -           | +                     | -           | -           | -           |
| EC5                     | 2018              | 1024                     | 1024 | 64  | 256  | 256  | -                   | -           | -           | -           | -           | +                     | -           | -           | -           |
| EC18                    | 2018              | 1024                     | 1024 | 256 | 512  | 512  | -                   | -           | -           | -           | -           | +                     | +           | +           | -           |
| EC26                    | 2019              | 1024                     | 512  | 256 | 256  | 512  | -                   | +           | +           | -           | -           | +                     | +           | +           | -           |
| EC40                    | 2019              | 1024                     | 1024 | 64  | 512  | 1024 | -                   | +           | -           | -           | -           | -                     | +           | +           | -           |
| EC31                    | 2019              | 1024                     | 1024 | 256 | 512  | 256  | -                   | -           | -           | -           | -           | -                     | -           | +           | -           |
| EC35                    | 2019              | 1024                     | 1024 | 64  | 512  | 512  | -                   | -           | -           | -           | -           | -                     | -           | +           | -           |
| EC6                     | 2018              | 512                      | 64   | 64  | 128  | 64   | -                   | -           | -           | -           | +           | +                     | -           | -           | -           |
| EC4                     | 2018              | 512                      | 256  | 64  | 256  | 128  | -                   | -           | -           | -           | +           | +                     | -           | -           | -           |
| EC14                    | 2018              | 256                      | 512  | 128 | 128  | 64   | -                   | -           | -           | -           | +           | +                     | -           | -           | -           |
| EC21                    | 2018              | 512                      | 256  | 64  | 256  | 128  | -                   | -           | -           | -           | +           | +                     | -           | -           | -           |
| EC23                    | 2019              | 512                      | 256  | 128 | 128  | 256  | -                   | -           | -           | -           | +           | +                     | -           | -           | -           |
| EC33                    | 2019              | 256                      | 512  | 64  | 512  | 512  | -                   | -           | -           | +           | +           | +                     | -           | -           | -           |
| EC41                    | 2019              | 256                      | 512  | 64  | 256  | 512  | -                   | -           | -           | +           | -           | +                     | -           | -           | -           |
| EC15                    | 2018              | 512                      | 256  | 64  | 256  | 512  | -                   | -           | -           | -           | -           | +                     | -           | -           | -           |
| EC16                    | 2018              | 256                      | 512  | 128 | 64   | 256  | -                   | -           | -           | -           | -           | +                     | -           | -           | -           |
| EC17                    | 2018              | 512                      | 256  | 64  | 128  | 512  | -                   | -           | -           | -           | -           | +                     | +           | +           | -           |
| EC19                    | 2018              | 512                      | 256  | 128 | 512  | 512  | -                   | -           | -           | -           | -           | +                     | +           | +           | -           |
| EC24                    | 2019              | 256                      | 512  | 64  | 64   | 128  | -                   | -           | -           | -           | -           | +                     | +           | +           | -           |
| EC25                    | 2019              | 256                      | 512  | 64  | 32   | 64   | -                   | +           | +           | -           | -           | +                     | +           | +           | -           |
| EC32                    | 2019              | 256                      | 512  | 128 | 256  | 512  | -                   | +           | -           | -           | -           | -                     | -           | +           | -           |
| EC30                    | 2019              | 512                      | 256  | 64  | 128  | 256  | -                   | +           | -           | -           | -           | -                     | -           | +           | -           |
| EC1                     | 2018              | 512                      | 256  | 64  | 128  | 512  | -                   | +           | -           | -           | -           | -                     | +           | +           | -           |
| EC38                    | 2019              | 512                      | 256  | 64  | 256  | 256  | -                   | -           | -           | -           | -           | -                     | -           | +           | -           |

|       |      |      |      |     |      |      |   |   |   |   |   |   |   |   |   |
|-------|------|------|------|-----|------|------|---|---|---|---|---|---|---|---|---|
| EC2   | 2018 | 256  | 512  | 128 | 1024 | 512  | - | - | - | - | - | - | - | + | - |
| EC20  | 2018 | 128  | 256  | 64  | 512  | 128  | - | - | - | + | - | + | - | - | - |
| EC28  | 2019 | 128  | 256  | 64  | 128  | 256  | - | + | + | - | - | + | + | + | + |
| EC12  | 2018 | 128  | 32   | 32  | 64   | 16   | + | - | - | - | + | + | - | - | - |
| EC13  | 2018 | 128  | 32   | 32  | 64   | 32   | + | - | - | - | + | + | - | - | - |
| EC43  | 2019 | 128  | 64   | 128 | 128  | 256  | - | - | - | + | - | + | - | - | - |
| EC44  | 2019 | 128  | 128  | 64  | 128  | 128  | - | - | - | + | - | + | - | - | - |
| EC11  | 2018 | 256  | 128  | 128 | 256  | 64   | + | - | - | - | + | + | - | - | - |
| EC27  | 2019 | 128  | 64   | 128 | 128  | 64   | - | + | + | - | - | + | + | + | - |
| EC3   | 2018 | 32   | 64   | 32  | 32   | 64   | - | - | - | - | - | + | - | - | - |
| EC8   | 2018 | 32   | 32   | 16  | 16   | 64   | - | - | - | + | - | + | - | - | - |
| EC9   | 2018 | 32   | 16   | 32  | 32   | 16   | - | - | - | - | - | + | - | - | - |
| EC10  | 2018 | 32   | 32   | 64  | 32   | 64   | - | - | - | - | - | + | - | - | - |
| EC37  | 2019 | 32   | 32   | 64  | 64   | 32   | - | + | - | - | - | - | + | + | + |
| EC39  | 2019 | 32   | 64   | 32  | 64   | 128  | - | + | - | - | - | - | + | + | + |
| EC34  | 2019 | 32   | 64   | 32  | 128  | 32   | - | - | - | - | - | - | - | + | - |
| EC29  | 2019 | 32   | 32   | 16  | 32   | 64   | - | + | - | - | - | + | + | + | + |
| EC36  | 2019 | 32   | 16   | 32  | 32   | 16   | - | + | - | - | - | - | + | + | + |
| EC45  | 2019 | 8    | ND   | 16  | ND   | ND   | - | - | - | - | - | - | - | - | - |
| EC46  | 2019 | 4    | ND   | 16  | ND   | ND   | - | - | - | - | - | - | - | - | - |
| KLP12 | 2018 | 1024 | 1024 | 256 | 512  | 256  | - | - | - | + | + | + | + | + | - |
| KLP6  | 2018 | 1024 | 512  | 256 | 1024 | 256  | - | - | - | + | - | + | + | + | - |
| KLP26 | 2018 | 1024 | 1024 | 64  | 1024 | 1024 | - | - | - | + | - | + | + | + | - |
| KLP29 | 2018 | 1024 | 512  | 256 | 512  | 512  | - | - | - | - | - | + | + | + | - |
| KLP23 | 2018 | 1024 | 1024 | 64  | 512  | 1024 | - | + | - | - | - | + | + | + | - |
| KLP39 | 2018 | 1024 | 1024 | 64  | 1024 | 512  | - | + | - | - | - | + | + | + | - |
| KLP48 | 2019 | 1024 | 512  | 256 | 1024 | 512  | - | + | - | - | - | + | + | + | - |
| KLP52 | 2019 | 1024 | 512  | 256 | 512  | 512  | - | + | - | - | - | - | + | + | - |
| KLP42 | 2018 | 256  | 512  | 128 | 512  | 1024 | - | + | - | - | - | + | + | + | - |
| KLP35 | 2018 | 512  | 256  | 64  | 512  | 256  | - | + | - | - | - | - | + | + | - |

|       |      |     |     |     |      |      |   |   |   |   |   |   |   |   |   |
|-------|------|-----|-----|-----|------|------|---|---|---|---|---|---|---|---|---|
| KLP40 | 2018 | 512 | 256 | 64  | 256  | 256  | - | + | - | - | - | + | + | + | - |
| KLP21 | 2018 | 512 | 256 | 64  | 512  | 512  | - | + | - | - | - | + | + | + | - |
| KLP27 | 2018 | 512 | 256 | 64  | 256  | 256  | - | - | - | + | - | + | + | + | - |
| KLP28 | 2018 | 256 | 512 | 128 | 1024 | 512  | - | - | - | + | - | + | + | + | - |
| KLP16 | 2018 | 512 | 256 | 128 | 256  | 512  | - | - | - | + | - | + | + | + | - |
| KLP17 | 2018 | 256 | 512 | 64  | 256  | 512  | - | - | - | + | - | + | + | + | - |
| KLP4  | 2018 | 256 | 512 | 64  | 512  | 1024 | - | - | - | + | - | + | + | + | - |
| KLP1  | 2018 | 256 | 512 | 128 | 1024 | 512  | - | - | - | + | + | + | + | + | - |
| KLP8  | 2018 | 512 | 256 | 64  | 256  | 512  | - | - | - | + | + | + | + | + | - |
| KLP47 | 2018 | 256 | 512 | 128 | 512  | 512  | - | + | - | - | - | + | + | + | - |
| KLP2  | 2018 | 256 | 512 | 128 | 256  | 256  | - | + | - | - | - | - | + | + | - |
| KLP49 | 2019 | 128 | 64  | 128 | 64   | 64   | - | + | - | - | - | + | + | + | - |
| KLP50 | 2019 | 128 | 128 | 64  | 256  | 128  | - | + | - | - | - | + | + | + | - |
| KLP55 | 2019 | 128 | 64  | 128 | 64   | 64   | - | + | - | - | - | + | + | + | - |
| KLP56 | 2019 | 128 | 128 | 64  | 128  | 256  | - | + | - | - | - | + | + | + | - |
| KLP60 | 2019 | 128 | 128 | 64  | 256  | 128  | - | + | - | - | - | + | + | + | - |
| KLP46 | 2018 | 128 | 128 | 64  | 128  | 64   | - | - | - | - | - | - | - | + | - |
| KLP7  | 2018 | 128 | 64  | 128 | 64   | 64   | - | - | - | + | - | + | + | + | - |
| KLP9  | 2018 | 128 | 128 | 64  | 128  | 128  | - | - | - | + | - | + | + | + | - |
| KLP11 | 2018 | 128 | 256 | 64  | 256  | 256  | - | - | - | + | - | + | + | + | - |
| KLP45 | 2018 | 128 | 128 | 64  | 256  | 128  | - | + | - | - | - | + | + | + | - |
| KLP36 | 2018 | 128 | 256 | 64  | 256  | 512  | - | + | - | - | - | + | + | + | - |
| KLP53 | 2019 | 128 | 64  | 128 | 64   | 128  | - | - | - | - | - | - | + | + | - |
| KLP54 | 2019 | 128 | 128 | 64  | 128  | 128  | - | - | - | - | - | - | - | + | - |
| KLP3  | 2018 | 128 | 256 | 64  | 256  | 512  | - | - | - | - | - | - | - | + | - |
| KLP30 | 2018 | 128 | 64  | 128 | 128  | 64   | - | - | - | - | - | + | + | + | - |
| KLP41 | 2018 | 128 | 128 | 64  | 128  | 128  | - | - | - | - | - | + | + | + | - |
| KLP43 | 2018 | 128 | 256 | 64  | 256  | 512  | - | - | - | - | - | + | + | + | - |
| KLP51 | 2019 | 128 | 256 | 64  | 512  | 256  | - | + | - | - | - | + | + | + | - |
| KLP57 | 2019 | 128 | 256 | 64  | 256  | 256  | - | + | - | - | - | + | + | + | - |



|       |      |      |      |     |     |     |   |   |   |   |   |   |   |   |   |
|-------|------|------|------|-----|-----|-----|---|---|---|---|---|---|---|---|---|
| KLP61 | 2019 | 128  | 256  | 64  | 128 | 512 | - | + | - | - | - | + | + | + | - |
| KLP37 | 2018 | 128  | 64   | 128 | 64  | 128 | - | + | - | - | - | + | + | + | - |
| KLP5  | 2018 | 128  | 128  | 64  | 128 | 256 | - | + | - | - | - | + | + | + | - |
| KLP10 | 2018 | 128  | 256  | 64  | 512 | 256 | - | + | - | - | - | + | + | + | - |
| KLP15 | 2018 | 32   | 32   | 16  | 128 | 64  | - | - | - | + | - | + | + | + | - |
| KLP18 | 2018 | 32   | 16   | 32  | 16  | 32  | - | - | - | + | - | + | + | + | - |
| KLP19 | 2018 | 32   | 32   | 64  | 32  | 32  | - | - | - | + | - | + | + | + | - |
| KLP20 | 2018 | 32   | 64   | 32  | 64  | 128 | - | - | - | + | - | + | + | + | - |
| KLP24 | 2018 | 32   | 32   | 16  | 32  | 64  | - | + | - | - | - | + | + | + | - |
| KLP25 | 2018 | 32   | 16   | 32  | 16  | 32  | - | + | - | - | - | + | + | + | - |
| KLP31 | 2018 | 32   | 32   | 64  | 32  | 32  | - | + | - | - | - | + | + | + | - |
| KLP38 | 2018 | 32   | 64   | 32  | 64  | 128 | - | + | - | - | - | + | + | + | - |
| KLP32 | 2018 | 32   | 32   | 16  | 32  | 32  | - | + | - | - | - | + | + | + | - |
| KLP33 | 2018 | 32   | 16   | 32  | 16  | 16  | - | + | - | - | - | + | + | + | - |
| KLP34 | 2018 | 32   | 32   | 64  | 32  | 32  | - | + | - | - | - | + | + | + | - |
| KLP22 | 2018 | 32   | 64   | 32  | 64  | 64  | - | + | - | - | - | + | + | + | - |
| KLP44 | 2018 | 32   | 32   | 16  | 64  | 32  | - | + | - | - | - | + | + | + | - |
| KLP59 | 2019 | 32   | 32   | 16  | 32  | 64  | - | + | - | - | - | + | + | + | - |
| KLP62 | 2019 | 32   | 32   | 16  | 32  | 32  | - | + | - | - | - | - | + | + | - |
| KLP13 | 2018 | 32   | 16   | 32  | 32  | 16  | - | + | - | - | - | - | + | + | - |
| KLP14 | 2018 | 32   | 32   | 64  | 32  | 64  | - | + | - | - | - | - | + | + | - |
| KLP58 | 2019 | 32   | 32   | 16  | 64  | 128 | - | - | - | - | - | - | - | + | - |
| KLP63 | 2019 | 8    | ND   | 32  | 128 | 32  | - | - | - | - | - | - | - | - | - |
| KLP64 | 2019 | 8    | ND   | 16  | 64  | 16  | - | - | - | - | - | - | - | - | - |
| KLP65 | 2019 | 4    | ND   | ND  | 16  | 64  | - | - | - | - | - | - | - | - | - |
| PLM10 | 2019 | 1024 | 1024 | 64  | 256 | 512 | - | - | - | - | + | + | + | + | - |
| PLM11 | 2019 | 512  | 256  | 64  | 256 | 512 | + | - | - | - | + | + | + | + | - |
| PLM12 | 2019 | 256  | 512  | 128 | 512 | 256 | + | - | - | - | + | + | + | + | - |
| PLM1  | 2018 | 128  | 64   | 128 | 64  | 128 | + | - | - | - | + | + | + | + | - |
| PLM4  | 2018 | 128  | 128  | 64  | 128 | 256 | + | - | - | - | + | - | + | + | - |

|      |      |     |     |     |     |     |   |   |   |   |   |   |   |   |   |
|------|------|-----|-----|-----|-----|-----|---|---|---|---|---|---|---|---|---|
| PLM3 | 2018 | 128 | 256 | 64  | 512 | 256 | + | - | - | - | + | - | + | - | - |
| PLM2 | 2018 | 32  | 16  | 32  | 64  | 32  | - | - | - | - | + | + | - | + | - |
| PLM6 | 2018 | 32  | 32  | 64  | 32  | 16  | - | - | - | - | + | + | - | + | - |
| PLM8 | 2019 | 32  | 64  | 32  | 128 | 128 | - | - | - | - | + | + | - | + | - |
| PLM5 | 2018 | 32  | 32  | 16  | 32  | 32  | + | - | - | - | - | - | + | - | - |
| PLM7 | 2019 | 32  | 32  | 64  | 32  | 64  | + | - | - | - | - | - | + | - | - |
| PLM9 | 2019 | 32  | 64  | 32  | 64  | 64  | + | - | - | - | - | - | + | - | - |
| CRF1 | 2018 | 128 | 256 | 64  | 256 | 512 | - | + | - | - | - | + | - | - | - |
| CRF3 | 2018 | 128 | 64  | 128 | 64  | 128 | - | - | - | - | - | + | - | - | - |
| CRF6 | 2018 | 128 | 128 | 64  | 256 | 128 | - | + | - | - | - | + | - | - | - |
| CRF2 | 2018 | 128 | 64  | 128 | 64  | 64  | - | + | - | - | - | + | - | - | - |
| CRF4 | 2018 | 128 | 128 | 64  | 128 | 256 | - | + | - | - | - | + | - | - | - |
| CRF5 | 2018 | 128 | 256 | 64  | 512 | 128 | - | + | - | - | - | + | - | - | - |
| CRF7 | 2019 | 8   | 16  | 32  | 16  | 32  | - | + | - | - | - | + | - | - | - |
| CRF8 | 2019 | 8   | ND  | ND  | 32  | 64  | - | - | - | - | - | - | - | - | - |
| KLO7 | 2019 | 256 | 512 | 64  | 256 | 128 | - | + | - | + | - | + | + | + | - |
| KLO5 | 2018 | 256 | 512 | 64  | 512 | 256 | - | + | - | + | - | + | + | + | - |
| KLO3 | 2018 | 512 | 256 | 128 | 512 | 128 | - | + | - | - | - | + | - | - | - |
| KLO2 | 2018 | 256 | 512 | 64  | 512 | 256 | - | - | - | - | - | + | - | - | - |
| KLO1 | 2018 | 256 | 512 | 64  | 512 | 64  | - | - | - | - | - | + | - | - | - |
| KLO6 | 2018 | 32  | 16  | 32  | 16  | 32  | - | + | - | + | - | - | + | + | - |
| KLO4 | 2018 | 32  | 32  | 16  | 64  | 32  | - | + | - | - | - | + | + | - | - |
| ERC1 | 2018 | 256 | 512 | 64  | 512 | 128 | - | - | - | - | + | + | + | - | - |
| ERC3 | 2018 | 512 | 256 | 128 | 512 | 256 | - | - | - | - | + | - | - | - | - |
| ERC2 | 2018 | 32  | 32  | 16  | 32  | 64  | - | - | - | - | + | + | + | - | - |
| ERC4 | 2018 | 16  | 32  | 16  | 32  | 32  | - | - | - | - | - | - | - | - | - |
| ERC5 | 2019 | ND  | 16  | ND  | 16  | 32  | - | - | - | - | - | - | - | - | - |
| ERC6 | 2019 | ND  | 8   | ND  | 8   | 8   | - | - | - | - | - | - | - | - | - |
| PSV2 | 2018 | ND  | 32  | 64  | 32  | 64  | + | - | - | - | - | + | - | - | - |
| PSV1 | 2018 | 16  | 32  | ND  | 32  | 32  | + | - | - | - | - | + | - | - | - |

|      |      |    |     |     |     |     |   |   |   |   |   |   |   |   |   |
|------|------|----|-----|-----|-----|-----|---|---|---|---|---|---|---|---|---|
| PSV3 | 2019 | ND | ND  | 32  | 128 | 16  | - | - | - | - | - | + | - | - | - |
| MAM1 | 2019 | 32 | 128 | 128 | 128 | 512 | - | + | - | - | - | - | - | - | - |
| MAM3 | 2019 | 4  | ND  | 32  | 16  | 64  | - | - | - | - | - | - | - | - | - |
| MAM2 | 2019 | ND | 16  | ND  | 64  | 16  | - | - | - | - | - | - | - | - | - |

**Abbreviations used in Tables;** EC- *Escherichia coli*, KLP- *Klebsiella pneumonia*, PLM- *Proteus mirabilis* ,CRF- *Citrobacter freundii*, KLO - *Klebsiella oxytoca*, ERC – *Enterobacter cloacae*, PSV- *Proteus vulgaris*, MAM- *Morganella morganii* , R- Resistance , S- Susceptible ,I –Intermediate Resistance , ND- Not done

**Table S7.** Distribution of aminoglycoside modifying genes in extended spectrum beta-lactamase producing *Enterobacteriales* isolates and its comparison with minimum inhibitory concentrations of aminoglycosides tested.

| Key for Isolates | Year of isolation | MICs of Aminoglycosides |      |     |      | AME encoding genes detected |                  |                   |                   |                    |                    |                     |                   |                    |             |  |
|------------------|-------------------|-------------------------|------|-----|------|-----------------------------|------------------|-------------------|-------------------|--------------------|--------------------|---------------------|-------------------|--------------------|-------------|--|
|                  |                   | GEN                     | TOB  | AMK | K    | <i>aac(3)-Ib</i>            | <i>aac(3)-Ia</i> | <i>aac(3)-IIa</i> | <i>aac(6')-Ib</i> | <i>ant(2'')-Ia</i> | <i>ant(3'')-Ia</i> | <i>ant(4'')-IIa</i> | <i>aph(3')-Ia</i> | <i>aph(3'')-Ib</i> | <i>armA</i> |  |
| EC13             | 2018              | 1024                    | 512  | 256 | 256  | -                           | -                | +                 | +                 | -                  | -                  | -                   | -                 | -                  | -           |  |
| EC23             | 2019              | 1024                    | 512  | 64  | 128  | -                           | -                | +                 | +                 | -                  | -                  | -                   | -                 | -                  | -           |  |
| EC10             | 2018              | 1024                    | 1024 | 64  | 128  | -                           | -                | +                 | +                 | -                  | +                  | +                   | +                 | +                  | -           |  |
| EC18             | 2018              | 1024                    | 1024 | 256 | 512  | -                           | +                | -                 | +                 | -                  | +                  | -                   | +                 | +                  | -           |  |
| EC26             | 2019              | 1024                    | 512  | 256 | 512  | -                           | -                | -                 | +                 | -                  | +                  | -                   | +                 | +                  | -           |  |
| EC12             | 2018              | 512                     | 128  | 64  | 128  | -                           | -                | +                 | +                 | -                  | -                  | -                   | -                 | -                  | -           |  |
| EC21             | 2018              | 512                     | 256  | 64  | 128  | -                           | -                | +                 | +                 | -                  | -                  | -                   | -                 | -                  | -           |  |
| EC20             | 2018              | 512                     | 256  | 64  | 256  | -                           | -                | +                 | +                 | -                  | -                  | -                   | -                 | -                  | -           |  |
| EC9              | 2018              | 512                     | 64   | 64  | 128  | -                           | -                | +                 | +                 | -                  | +                  | +                   | +                 | -                  | -           |  |
| EC15             | 2018              | 512                     | 256  | 64  | 128  | +                           | -                | +                 | +                 | -                  | +                  | +                   | +                 | +                  | -           |  |
| EC17             | 2018              | 512                     | 256  | 64  | 256  | -                           | +                | -                 | +                 | -                  | +                  | +                   | +                 | +                  | -           |  |
| EC19             | 2018              | 512                     | 256  | 128 | 512  | -                           | +                | -                 | +                 | -                  | +                  | -                   | +                 | +                  | -           |  |
| EC24             | 2019              | 256                     | 512  | 64  | 256  | -                           | +                | -                 | +                 | -                  | +                  | -                   | +                 | +                  | -           |  |
| EC25             | 2019              | 256                     | 512  | 64  | 512  | -                           | +                | -                 | +                 | -                  | +                  | -                   | +                 | +                  | -           |  |
| EC16             | 2018              | 256                     | 512  | 128 | 256  | +                           | +                | -                 | +                 | -                  | +                  | +                   | +                 | +                  | -           |  |
| EC29             | 2019              | 128                     | 256  | 64  | 512  | -                           | -                | -                 | +                 | -                  | +                  | -                   | -                 | +                  | -           |  |
| EC22             | 2018              | 256                     | 512  | 64  | 1024 | -                           | -                | +                 | +                 | -                  | -                  | -                   | -                 | -                  | -           |  |
| EC11             | 2018              | 256                     | 64   | 32  | 128  | -                           | -                | +                 | +                 | -                  | -                  | -                   | -                 | -                  | -           |  |
| EC8              | 2018              | 256                     | 128  | 128 | 64   | -                           | -                | +                 | +                 | -                  | +                  | +                   | +                 | -                  | -           |  |
| EC14             | 2018              | 128                     | 256  | 32  | 128  | -                           | -                | +                 | +                 | -                  | -                  | -                   | -                 | -                  | -           |  |
| EC6              | 2018              | 128                     | 64   | 32  | 32   | -                           | -                | +                 | +                 | -                  | -                  | -                   | -                 | -                  | -           |  |
| EC4              | 2018              | 128                     | 64   | 32  | 128  | -                           | -                | +                 | +                 | -                  | -                  | -                   | +                 | -                  | -           |  |
| EC33             | 2019              | 128                     | 64   | 32  | 32   | -                           | -                | +                 | +                 | -                  | -                  | -                   | +                 | -                  | -           |  |
| EC3              | 2018              | 128                     | 32   | 32  | 128  | -                           | -                | +                 | +                 | -                  | -                  | +                   | +                 | -                  | -           |  |
| EC5              | 2018              | 128                     | 32   | 32  | 32   | -                           | -                | +                 | +                 | -                  | -                  | +                   | +                 | -                  | -           |  |
| EC27             | 2019              | 128                     | 64   | 128 | 64   | -                           | -                | -                 | +                 | -                  | +                  | -                   | -                 | +                  | -           |  |

|       |      |      |      |     |      |   |   |   |   |   |   |   |   |   |   |
|-------|------|------|------|-----|------|---|---|---|---|---|---|---|---|---|---|
| EC28  | 2019 | 128  | 128  | 64  | 128  | - | - | - | + | - | + | - | - | + | - |
| EC7   | 2018 | 64   | 64   | 32  | 256  | - | - | + | + | - | - | - | + | - | - |
| EC40  | 2019 | 32   | 32   | 64  | 64   | - | - | - | - | - | + | - | - | + | - |
| EC32  | 2019 | 32   | 32   | 16  | 64   | - | - | - | - | - | + | - | - | + | - |
| EC39  | 2019 | 32   | 16   | 32  | 64   | - | - | - | - | - | + | - | - | + | - |
| EC36  | 2019 | 32   | 64   | 32  | 128  | - | - | - | - | - | + | - | - | + | - |
| EC37  | 2019 | 32   | 32   | ND  | 64   | - | - | - | - | - | + | - | - | + | - |
| EC1   | 2018 | 32   | 32   | ND  | 64   | - | - | - | - | - | + | - | - | + | - |
| EC2   | 2018 | 16   | 32   | ND  | 64   | - | - | - | - | - | + | - | - | + | - |
| EC30  | 2019 | 32   | 64   | ND  | 256  | - | - | - | - | - | + | - | - | + | + |
| EC31  | 2019 | 32   | 16   | ND  | 64   | - | - | - | - | - | - | - | - | - | + |
| EC34  | 2019 | 32   | 16   | ND  | 32   | - | - | - | - | - | - | - | - | - | + |
| EC35  | 2019 | 32   | 16   | ND  | 64   | - | - | - | - | - | - | - | - | - | + |
| EC38  | 2019 | 32   | 16   | ND  | 64   | - | - | - | - | - | - | - | - | - | + |
| EC41  | 2019 | ND   | 32   | ND  | 128  | - | - | - | - | - | - | - | - | - | - |
| EC42  | 2019 | ND   | 16   | ND  | 64   | - | - | - | - | - | - | - | - | - | - |
| EC43  | 2019 | ND   | 32   | ND  | 128  | - | - | - | - | - | - | - | - | - | - |
| EC44  | 2019 | ND   | 64   | ND  | 64   | - | - | - | - | - | - | - | - | - | - |
| EC45  | 2019 | ND   | 16   | ND  | 64   | - | - | - | - | - | - | - | - | - | - |
| KLP16 | 2018 | 1024 | 512  | 256 | 256  | + | - | - | + | - | - | - | - | - | - |
| KLP12 | 2018 | 1024 | 512  | 64  | 1024 | - | - | - | + | - | - | - | - | - | - |
| KLP27 | 2018 | 1024 | 1024 | 64  | 1024 | - | - | + | + | + | + | - | + | + | - |
| KLP42 | 2018 | 1024 | 512  | 256 | 512  | - | - | + | + | - | - | + | + | + | + |
| KLP25 | 2018 | 1024 | 1024 | 64  | 512  | - | - | - | + | - | - | - | + | - | - |
| KLP38 | 2018 | 1024 | 512  | 256 | 1024 | - | - | - | + | - | - | - | - | - | - |
| KLP17 | 2018 | 512  | 256  | 64  | 512  | + | - | - | + | - | - | - | - | - | - |
| KLP4  | 2018 | 512  | 256  | 64  | 128  | - | - | - | + | - | - | - | + | - | - |
| KLP23 | 2018 | 512  | 1024 | 256 | 512  | - | - | + | + | + | + | - | + | - | - |
| KLP26 | 2018 | 512  | 64   | 64  | 32   | - | - | + | + | + | + | - | + | + | - |
| KLP28 | 2018 | 512  | 256  | 64  | 512  | - | - | + | + | + | + | - | + | + | - |

|       |      |     |     |     |      |   |   |   |   |   |   |   |   |   |   |
|-------|------|-----|-----|-----|------|---|---|---|---|---|---|---|---|---|---|
| KLP30 | 2018 | 512 | 256 | 64  | 512  | - | - | + | + | - | + | - | + | + | - |
| KLP33 | 2018 | 512 | 256 | 128 | 128  | - | - | + | + | - | + | - | + | + | + |
| KLP24 | 2018 | 512 | 64  | 64  | 128  | - | - | - | + | - | - | - | + | - | - |
| KLP22 | 2018 | 128 | 512 | 128 | 1024 | - | - | + | + | + | + | - | + | - | - |
| KLP8  | 2018 | 256 | 512 | 64  | 1024 | + | - | - | + | - | - | - | - | - | - |
| KLP14 | 2018 | 512 | 256 | 64  | 128  | - | - | - | + | - | - | - | - | - | - |
| KLP10 | 2018 | 512 | 256 | 64  | 512  | - | - | - | + | - | - | - | - | - | - |
| KLP21 | 2018 | 512 | 256 | 128 | 128  | - | - | - | + | - | - | - | - | - | - |
| KLP5  | 2018 | 256 | 128 | 128 | 256  | - | - | - | + | - | - | - | + | - | - |
| KLP31 | 2018 | 256 | 512 | 64  | 1024 | - | - | - | + | - | - | - | - | - | - |
| KLP35 | 2018 | 256 | 512 | 64  | 1024 | - | - | - | + | - | - | - | - | - | - |
| KLP13 | 2018 | 256 | 512 | 128 | 512  | - | - | - | + | - | - | - | - | - | - |
| KLP29 | 2018 | 256 | 512 | 128 | 256  | - | - | + | + | - | + | - | + | + | - |
| KLP7  | 2018 | 256 | 64  | 16  | 32   | - | - | - | + | - | + | - | + | - | - |
| KLP34 | 2018 | 256 | 512 | 64  | 512  | - | - | + | + | - | + | - | + | + | + |
| KLP41 | 2018 | 256 | 512 | 64  | 1024 | - | - | + | + | - | - | + | + | + | + |
| KLP3  | 2018 | 128 | 64  | 64  | 512  | - | - | - | + | - | - | - | - | - | - |
| KLP32 | 2018 | 128 | 64  | 64  | 128  | - | - | + | + | - | + | - | + | + | + |
| KLP43 | 2018 | 128 | 16  | 16  | 32   | - | - | + | + | - | - | + | + | + | + |
| KLP18 | 2018 | 128 | 256 | 32  | 512  | - | - | - | + | - | + | - | + | - | - |
| KLP2  | 2018 | 128 | 32  | 32  | 128  | - | - | - | + | - | - | - | + | - | - |
| KLP9  | 2018 | 128 | 64  | 32  | 256  | - | - | - | + | - | + | - | + | - | - |
| KLP15 | 2018 | 128 | 64  | 32  | 256  | - | - | - | + | - | + | - | + | - | - |
| KLP19 | 2018 | 128 | 256 | 64  | 128  | - | - | - | + | - | + | - | + | - | - |
| KLP20 | 2018 | 128 | 32  | 32  | 32   | - | - | + | + | + | + | - | + | - | - |
| KLP37 | 2018 | 64  | 128 | 32  | 256  | - | - | + | + | - | - | - | + | - | - |
| KLP11 | 2018 | 64  | 64  | 32  | 128  | - | - | - | + | - | + | - | + | - | - |
| KLP1  | 2018 | 32  | 16  | 16  | 8    | + | - | - | + | - | - | - | - | - | - |
| KLP44 | 2018 | 32  | 16  | 8   | 16   | - | - | + | + | - | - | + | + | + | + |
| KLP40 | 2018 | 32  | 16  | ND  | 8    | - | - | - | + | - | - | - | - | - | - |

|       |      |      |     |     |      |   |   |   |   |   |   |   |   |   |   |   |
|-------|------|------|-----|-----|------|---|---|---|---|---|---|---|---|---|---|---|
| KLP46 | 2018 | 32   | 16  | ND  | 8    | - | - | - | + | - | - | - | - | - | - | - |
| KLP45 | 2018 | 16   | 8   | 8   | 8    | - | - | + | + | - | - | - | + | + | + | + |
| KLP36 | 2018 | 16   | 32  | 16  | 64   | - | - | + | + | - | - | - | + | + | + | + |
| KLP6  | 2018 | 16   | 32  | 16  | 64   | - | - | + | + | - | - | - | + | + | + | + |
| KLP39 | 2018 | 16   | 32  | 16  | 32   | - | - | - | + | - | - | - | - | - | - | - |
| KLP47 | 2018 | ND   | 32  | ND  | 32   | - | - | - | - | - | - | - | - | - | - | - |
| KLP48 | 2019 | ND   | 16  | ND  | 16   | - | - | - | - | - | - | - | - | - | - | - |
| KLP49 | 2019 | ND   | 16  | ND  | 16   | - | - | - | - | - | - | - | - | - | - | - |
| KLP50 | 2019 | ND   | 8   | ND  | 8    | - | - | - | - | - | - | - | - | - | - | - |
| PLM1  | 2018 | 1024 | 256 | 128 | ND   | - | - | - | + | - | + | - | - | - | - | - |
| PLM3  | 2018 | 256  | 128 | 32  | ND   | - | - | - | + | - | - | - | - | - | - | - |
| PLM2  | 2018 | 16   | 32  | 16  | 64   | - | - | + | + | - | + | + | + | + | + | - |
| PLM4  | 2018 | 16   | 16  | ND  | 32   | - | - | - | - | - | - | - | - | - | - | - |
| PLM5  | 2018 | 8    | 32  | ND  | 16   | - | - | - | - | - | - | - | - | - | - | - |
| PLM6  | 2018 | 16   | ND  | ND  | ND   | - | - | - | - | - | - | - | - | - | - | - |
| PLM7  | 2019 | 32   | ND  | ND  | ND   | - | - | - | - | - | - | - | - | - | - | - |
| CRF1  | 2018 | 512  | 256 | 64  | 256  | + | + | - | + | - | - | - | - | - | - | - |
| CRF3  | 2018 | 512  | 256 | 64  | 512  | + | - | - | - | - | - | - | - | - | - | - |
| CRF2  | 2018 | 128  | 512 | 128 | 256  | + | - | - | + | - | - | - | - | - | - | - |
| CRF6  | 2018 | 32   | 128 | 16  | 64   | - | - | + | - | - | + | - | - | - | - | - |
| CRF4  | 2018 | 128  | 64  | 64  | 128  | - | - | + | - | - | + | - | - | - | - | - |
| CRF5  | 2018 | 16   | 64  | 32  | 128  | - | - | + | - | - | + | - | - | - | - | - |
| CRF7  | 2019 | ND   | 8   | ND  | ND   | - | - | - | - | - | - | - | - | - | - | - |
| KLO1  | 2018 | 128  | 256 | 64  | 128  | - | - | - | + | - | - | - | - | - | - | - |
| KLO2  | 2018 | 128  | 512 | 32  | 1024 | - | - | + | + | - | - | - | - | - | + | - |
| KLO3  | 2018 | 64   | 128 | 32  | 256  | - | - | - | + | - | - | - | - | - | - | - |
| KLO4  | 2018 | 16   | 32  | 16  | 16   | + | - | + | + | + | + | - | + | + | + | - |
| KLO5  | 2018 | ND   | 16  | 32  | ND   | - | - | - | - | - | - | - | - | - | - | - |
| KLO6  | 2018 | ND   | 32  | ND  | 32   | - | - | - | - | - | - | - | - | - | - | - |
| ERC2  | 2018 | 256  | 512 | 64  | 1024 | - | - | + | - | + | - | - | - | - | + | - |

|      |      |    |     |    |     |   |   |   |   |   |   |   |   |   |   |
|------|------|----|-----|----|-----|---|---|---|---|---|---|---|---|---|---|
| ERC1 | 2018 | 32 | 128 | 64 | 128 | + | - | + | + | + | + | - | - | + | - |
| ERC3 | 2018 | 16 | 64  | 32 | 32  | - | - | + | - | - | - | - | - | - | - |
| ERC4 | 2018 | 32 | 64  | 64 | 128 | - | - | - | - | - | - | - | - | - | - |
| ERC5 | 2019 | 16 | 16  | 32 | 32  | - | - | - | - | - | - | - | - | - | - |
| ERC6 | 2019 | 16 | 32  | 8  | 32  | - | - | - | - | - | - | - | - | - | - |
| ERC7 | 2019 | 16 | 64  | ND | 32  | - | - | - | - | - | - | - | - | - | - |
| ERC8 | 2019 | 8  | ND  | ND | ND  | - | - | - | - | - | - | - | - | - | - |
| PSV1 | 2018 | 32 | ND  | ND | ND  | - | - | - | - | - | + | - | - | - | - |
| PSV2 | 2018 | ND | 32  | ND | 16  | - | - | - | - | - | - | - | - | - | - |
| PSV3 | 2019 | ND | 16  | ND | 32  | - | - | - | - | - | - | - | - | - | - |
| MAM1 | 2019 | 32 | 128 | 16 | 256 | - | - | + | + | - | - | - | - | - | - |
| MAM3 | 2019 |    | 32  | 32 | 64  | - | - | - | - | - | - | - | - | - | - |
| MAM2 | 2019 | 16 | ND  | ND | ND  | - | - | - | - | - | - | - | - | - | - |

**Abbreviations used in Tables ;** EC- *Escherichia coli*, KLP- *Klebsiella pneumonia*, PLM- *Proteus mirabilis* ,CRF- *Citrobacter freundii*, KLO - *Klebsiella oxytoca*, ERC – *Enterobacter cloacae*, PSV- *Proteus vulgaris*, MAM- *Morganella morganii* , R- Resistance , S- Susceptible ,I –Intermediate Resistance , ND- Not done



**Table S8.** Distribution of trimethoprim-sulfamethoxazole (TMP-SMX) resistance genes in extended spectrum beta-lactamase producing *Enterobacteriales* isolates and its comparison with minimum inhibitory concentrations of TMP-SMX tested.

| Key for Isolates | Year of isolation |                 | TMP-SMX Genes detected |              |              |
|------------------|-------------------|-----------------|------------------------|--------------|--------------|
|                  |                   | MICs of TMP-SMX | <i>sul 1</i>           | <i>sul 2</i> | <i>dfr A</i> |
| EC20             | 2018              | 16/304          | +                      | -            | +            |
| EC14             | 2018              | 16/304          | +                      | -            | +            |
| EC7              | 2018              | 16/304          | +                      | -            | +            |
| EC4              | 2018              | 16/304          | +                      | -            | +            |
| EC23             | 2019              | 16/304          | +                      | -            | -            |
| EC33             | 2019              | 16/304          | +                      | +            | -            |
| EC29             | 2019              | 16/304          | +                      | +            | -            |
| EC15             | 2018              | 16/304          | +                      | -            | +            |
| EC16             | 2018              | 16/304          | +                      | -            | +            |
| EC19             | 2018              | 16/304          | +                      | -            | +            |
| EC8              | 2018              | 16/304          | +                      | -            | +            |
| EC9              | 2018              | 16/304          | +                      | -            | +            |
| EC10             | 2018              | 16/304          | +                      | -            | +            |
| EC25             | 2019              | 16/304          | +                      | -            | -            |
| EC26             | 2019              | 16/304          | +                      | -            | -            |
| EC30             | 2019              | 16/304          | +                      | +            | -            |
| EC31             | 2019              | 16/304          | +                      | +            | -            |
| EC35             | 2019              | 16/304          | +                      | +            | -            |
| EC1              | 2018              | 16/304          | +                      | -            | +            |
| EC2              | 2018              | 16/304          | +                      | -            | +            |
| EC22             | 2018              | 16/304          | +                      | -            | -            |
| EC38             | 2019              | 16/304          | -                      | -            | -            |
| EC40             | 2019              | 16/304          | -                      | -            | -            |
| EC43             | 2019              | 16/304          | -                      | -            | -            |
| EC45             | 2019              | 16/304          | -                      | -            | -            |
| EC52             | 2019              | 16/304          | -                      | -            | -            |

|      |      |        |   |   |   |
|------|------|--------|---|---|---|
| EC56 | 2019 | 16/304 | - | - | - |
| EC13 | 2018 | 8/152  | + | - | + |
| EC21 | 2018 | 8/152  | + | - | - |
| EC11 | 2018 | 8/152  | + | - | + |
| EC28 | 2019 | 8/152  | + | + | - |
| EC17 | 2018 | 8/152  | + | - | + |
| EC5  | 2018 | 8/152  | + | - | + |
| EC3  | 2018 | 8/152  | + | - | + |
| EC34 | 2019 | 8/152  | + | + | - |
| EC12 | 2018 | 4176   | + | - | + |
| EC6  | 2018 | 4176   | + | - | + |
| EC27 | 2019 | 4176   | + | + | - |
| EC18 | 2018 | 4176   | + | - | + |
| EC24 | 2019 | 4176   | + | - | - |
| EC32 | 2019 | 4176   | + | + | - |
| EC55 | 2019 | 4176   | - | - | - |
| EC42 | 2019 | 4176   | - | - | - |
| EC36 | 2019 | 4176   | - | - | - |
| EC37 | 2019 | 8/152  | - | - | - |
| EC41 | 2019 | 8/152  | - | - | - |
| EC44 | 2019 | 8/152  | - | - | - |
| EC48 | 2019 | 8/152  | - | - | - |
| EC51 | 2019 | 8/152  | - | - | - |
| EC53 | 2019 | 8/152  | - | - | - |
| EC54 | 2019 | 8/152  | - | - | - |
| EC57 | 2019 | 8/152  | - | - | - |
| EC49 | 2019 | 4176   | - | - | - |
| EC50 | 2019 | 4176   | - | - | - |
| EC46 | 2019 | 4176   | - | - | - |
| EC39 | 2019 | 4176   | - | - | - |

|       |      |        |   |   |   |
|-------|------|--------|---|---|---|
| KLP8  | 2018 | 16/304 | + | - | + |
| KLP12 | 2018 | 16/304 | + | - | + |
| KLP1  | 2018 | 16/304 | + | + | + |
| KLP7  | 2018 | 16/304 | + | - | + |
| KLP11 | 2018 | 16/304 | + | - | + |
| KLP15 | 2018 | 16/304 | + | - | + |
| KLP18 | 2018 | 16/304 | + | - | + |
| KLP22 | 2018 | 16/304 | + | - | + |
| KLP23 | 2018 | 16/304 | + | - | + |
| KLP26 | 2018 | 16/304 | + | - | + |
| KLP29 | 2018 | 16/304 | + | - | - |
| KLP30 | 2018 | 16/304 | + | - | - |
| KLP34 | 2018 | 16/304 | + | - | - |
| KLP36 | 2018 | 16/304 | + | - | - |
| KLP43 | 2018 | 16/304 | + | - | - |
| KLP44 | 2018 | 16/304 | + | - | - |
| KLP41 | 2018 | 16/304 | + | - | - |
| KLP4  | 2018 | 16/304 | + | + | + |
| KLP9  | 2018 | 16/304 | + | - | + |
| KLP6  | 2018 | 16/304 | + | + | + |
| KLP37 | 2018 | 16/304 | + | - | - |
| KLP38 | 2018 | 16/304 | + | - | - |
| KLP39 | 2018 | 16/304 | + | - | - |
| KLP10 | 2018 | 16/304 | + | - | + |
| KLP21 | 2018 | 16/304 | + | - | + |
| KLP31 | 2018 | 16/304 | + | - | - |
| KLP35 | 2018 | 16/304 | + | - | - |
| KLP3  | 2018 | 16/304 | + | + | + |
| KLP46 | 2018 | 16/304 | + | - | - |
| KLP48 | 2019 | 16/304 | - | - | - |

|       |      |        |   |   |   |
|-------|------|--------|---|---|---|
| KLP50 | 2019 | 16/304 | - | - | - |
| KLP52 | 2019 | 16/304 | - | - | - |
| KLP53 | 2019 | 16/304 | - | - | - |
| KLP55 | 2019 | 16/304 | - | - | - |
| KLP56 | 2019 | 16/304 | - | - | - |
| KLP57 | 2019 | 16/304 | - | - | - |
| KLP58 | 2019 | 16/304 | - | - | - |
| KLP60 | 2019 | 16/304 | - | - | - |
| KLP61 | 2019 | 16/304 | - | - | - |
| KLP62 | 2019 | 16/304 | - | - | - |
| KLP64 | 2019 | 16/304 | - | - | - |
| KLP66 | 2019 | 16/304 | - | - | - |
| KLP67 | 2019 | 16/304 | - | - | - |
| KLP16 | 2018 | 8/152  | + | - | + |
| KLP20 | 2018 | 8/152  | + | - | + |
| KLP27 | 2018 | 8/152  | + | - | + |
| KLP32 | 2018 | 8/152  | + | - | - |
| KLP42 | 2018 | 8/152  | + | - | - |
| KLP5  | 2018 | 8/152  | + | + | + |
| KLP14 | 2018 | 8/152  | + | - | + |
| KLP40 | 2018 | 8/152  | + | - | - |
| KLP24 | 2018 | 8/152  | + | - | + |
| KLP49 | 2019 | 8/152  | - | - | - |
| KLP51 | 2019 | 8/152  | - | - | - |
| KLP54 | 2019 | 8/152  | - | - | - |
| KLP65 | 2019 | 8/152  | - | - | - |
| KLP17 | 2018 | 4176   | + | - | + |
| KLP19 | 2018 | 4176   | + | - | + |
| KLP28 | 2018 | 4176   | + | - | + |
| KLP33 | 2018 | 4176   | + | - | - |

|       |      |        |   |   |   |
|-------|------|--------|---|---|---|
| KLP45 | 2018 | 4176   | + | - | - |
| KLP13 | 2018 | 4176   | + | - | + |
| KLP2  | 2018 | 4176   | + | + | + |
| KLP25 | 2018 | 4176   | + | - | + |
| KLP47 | 2018 | 4176   | - | - | - |
| KLP59 | 2019 | 4176   | - | - | - |
| KLP63 | 2019 | 4176   | - | - | - |
| PLM6  | 2018 | 16/304 | + | - | - |
| PLM1  | 2018 | 16/304 | + | - | + |
| PLM3  | 2018 | 16/304 | + | - | - |
| PLM7  | 2019 | 16/304 | - | - | - |
| PLM10 | 2019 | 16/304 | - | - | - |
| PLM4  | 2018 | 8/152  | + | - | - |
| PLM5  | 2018 | 8/152  | + | - | - |
| PLM9  | 2019 | 8/152  | - | - | - |
| PLM12 | 2019 | 8/152  | - | - | - |
| PLM2  | 2018 | 4176   | + | - | + |
| PLM8  | 2019 | 4176   | - | - | - |
| PLM11 | 2019 | 4176   | - | - | - |
| CRF1  | 2018 | 16/304 | + | - | + |
| CRF5  | 2018 | 16/304 | + | - | - |
| CRF7  | 2019 | 16/304 | + | - | - |
| CRF9  | 2019 | 16/304 | - | - | - |
| CRF11 | 2019 | 16/304 | - | - | - |
| CRF3  | 2018 | 8/152  | + | - | + |
| CRF6  | 2018 | 8/152  | + | - | - |
| CRF4  | 2018 | 8/152  | + | - | + |
| CRF10 | 2019 | 8/152  | - | - | - |
| CRF2  | 2018 | 4176   | + | - | + |
| CRF8  | 2019 | 4176   | - | - | - |

|      |      |        |   |   |   |
|------|------|--------|---|---|---|
| KLO6 | 2018 | 16/304 | + | - | - |
| KLO4 | 2018 | 16/304 | + | - | - |
| KLO5 | 2018 | 16/304 | + | - | - |
| KLO1 | 2018 | 16/304 | + | + | + |
| KLO3 | 2018 | 8/152  | + | - | - |
| KLO7 | 2019 | 8/152  | - | - | - |
| KLO8 | 2019 | 8/152  | - | - | - |
| KLO2 | 2018 | 4176   | + | - | - |
| KLO9 | 2019 | 4176   | - | - | - |
| ERC5 | 2019 | 16/304 | + | - | - |
| ERC2 | 2018 | 16/304 | + | - | + |
| ERC6 | 2019 | 16/304 | - | - | - |
| ERC7 | 2019 | 16/304 | - | - | - |
| ERC1 | 2018 | 8/152  | + | + | + |
| ERC3 | 2018 | 8/152  | + | - | - |
| ERC4 | 2018 | 8/152  | + | - | - |
| ERC8 | 2019 | 8/152  | - | - | - |
| ERC9 | 2019 | 8/152  | - | - | - |
| PSV1 | 2018 | 8/152  | + | - | + |
| PSV2 | 2018 | 4176   | + | - | - |
| MAM1 | 2019 | 16/304 | + | - | + |
| MAM2 | 2019 | 4176   | - | - | - |
| MAM3 | 2019 | 4176   | - | - | - |

**Abbreviations used in Tables ;** EC- *Escherichia coli*, KLP- *Klebsiella pneumonia*, PLM- *Proteus mirabilis*, CRF- *Citrobacter freundii*, KLO - *Klebsiella oxytoca*, ERC – *Enterobacter cloacae*, PSV- *Proteus vulgaris*, MAM- *Morganella morganii*, R- Resistance, S- Susceptible, I –Intermediate Resistance, ND- Not done
